# Supplementary material for: Lixisenatide Therapy in Older Patients With Type 2 Diabetes Inadequately Controlled on Their Current Antidiabetic Treatment: The GetGoal-O Randomized Trial
Source: Oxford University Press journal article supplement (doi:10.2337/dc16-2143), 2017-02-10
Supplement: dc162143supplementarydata.pdf [file dc162143supplementarydata.pdf]

## SUPPLEMENTARY DATA

**Supplementary Figure 1**—GetGoal-O trial design. \*Patients on both insulin and sulfonylurea/glinides were not eligible. eGFR, estimated glomerular filtration rate; FPG, fasting plasma glucose; PPG, postprandial plasma glucose; SMPG, self-monitored plasma glucose.

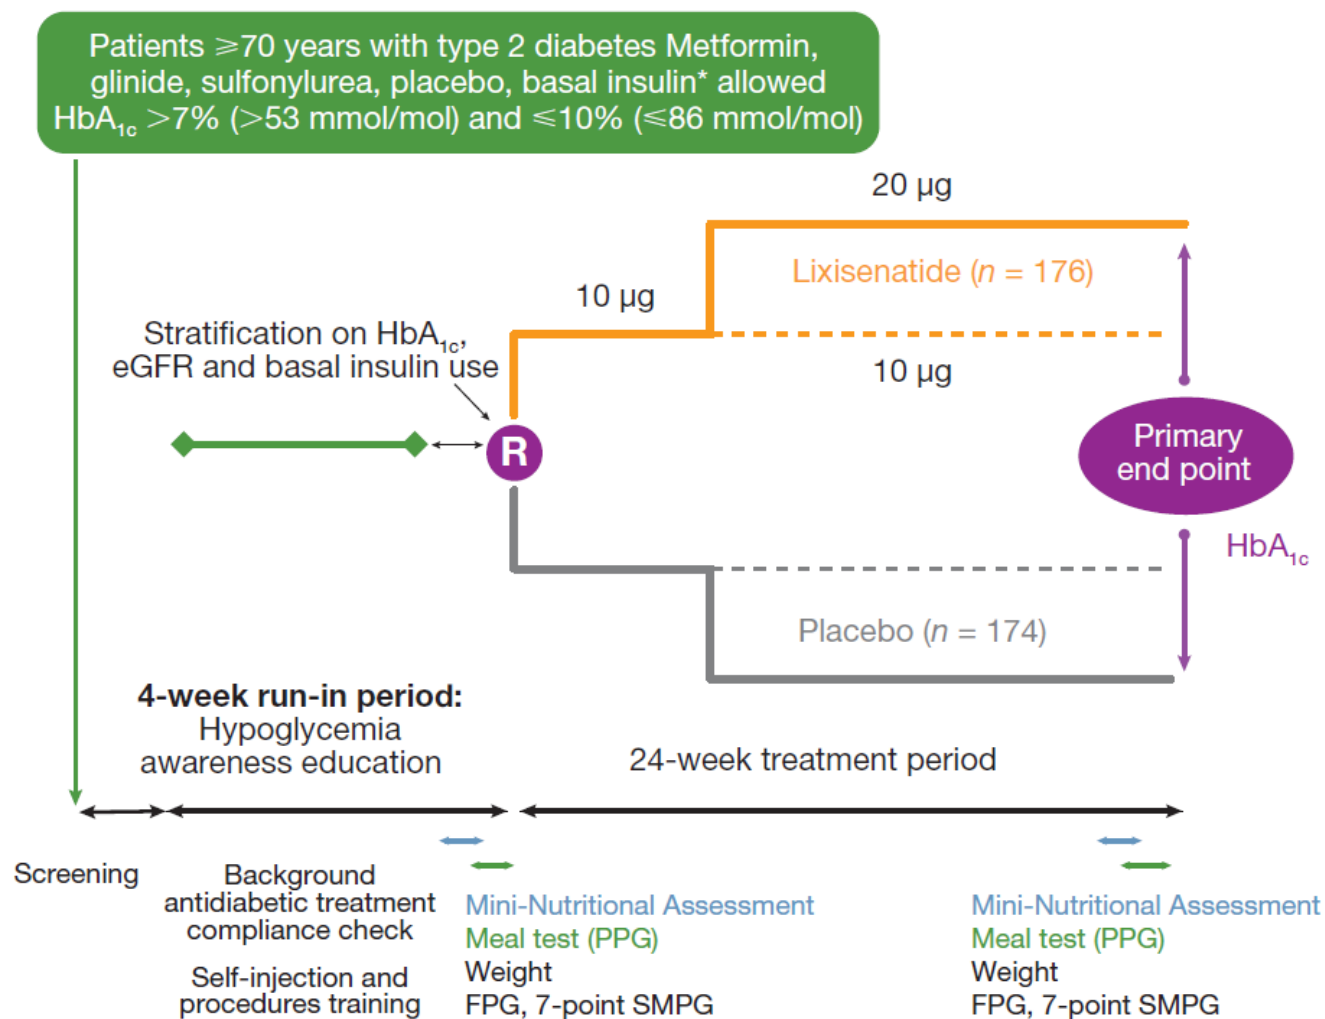

**Supplementary Figure 2**—Patient disposition in the GetGoal-O trial.

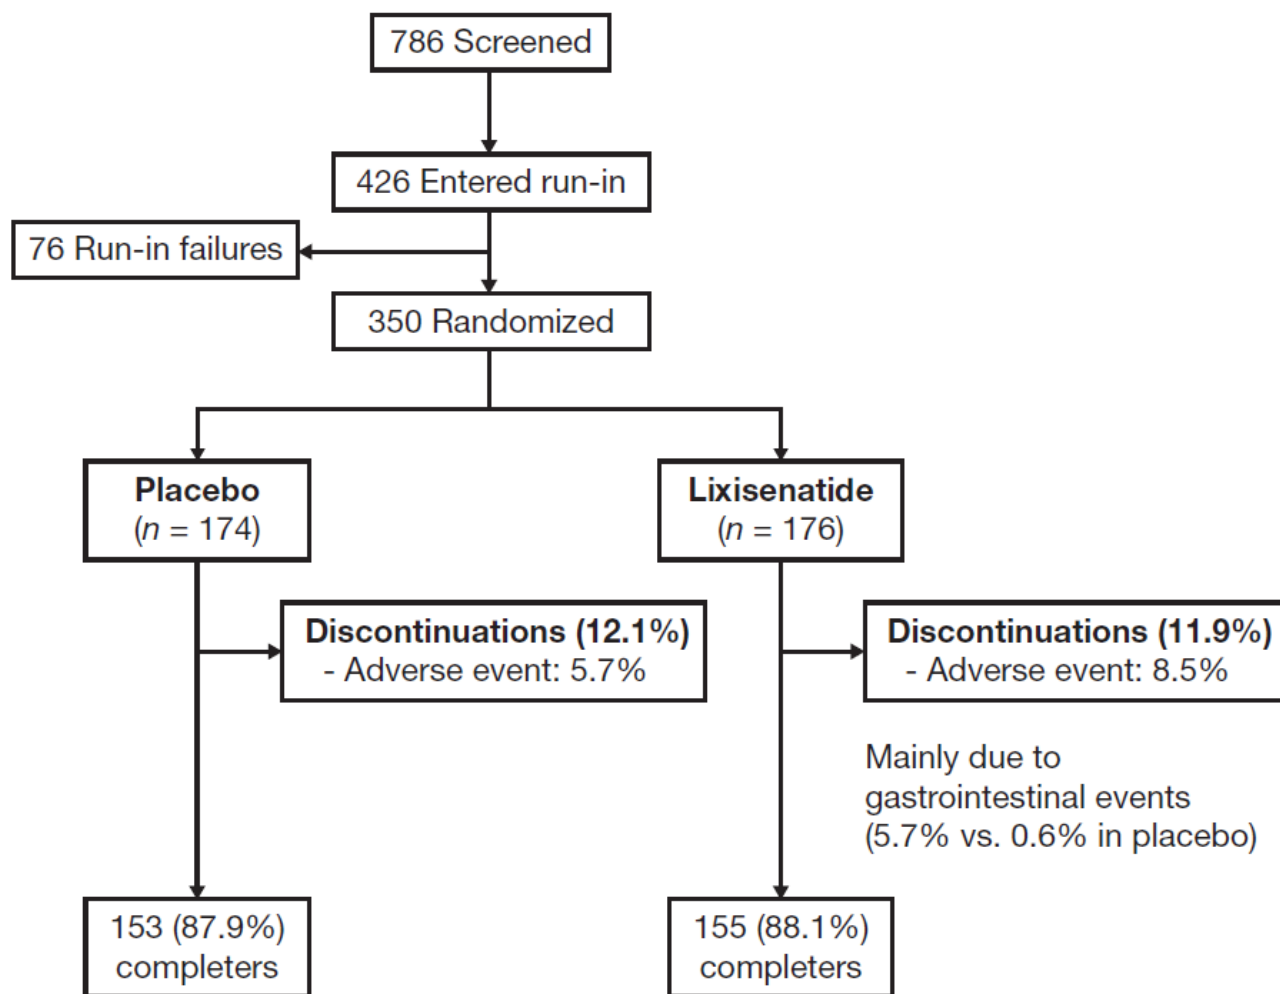

# SUPPLEMENTARY DATA

**Supplementary Figure 3**—Change in HbA<sub>1c</sub> by baseline factors and background antidiabetic therapy from baseline to week 24. eGFR, estimated glomerular filtration rate; OAD, oral antidiabetic drug.

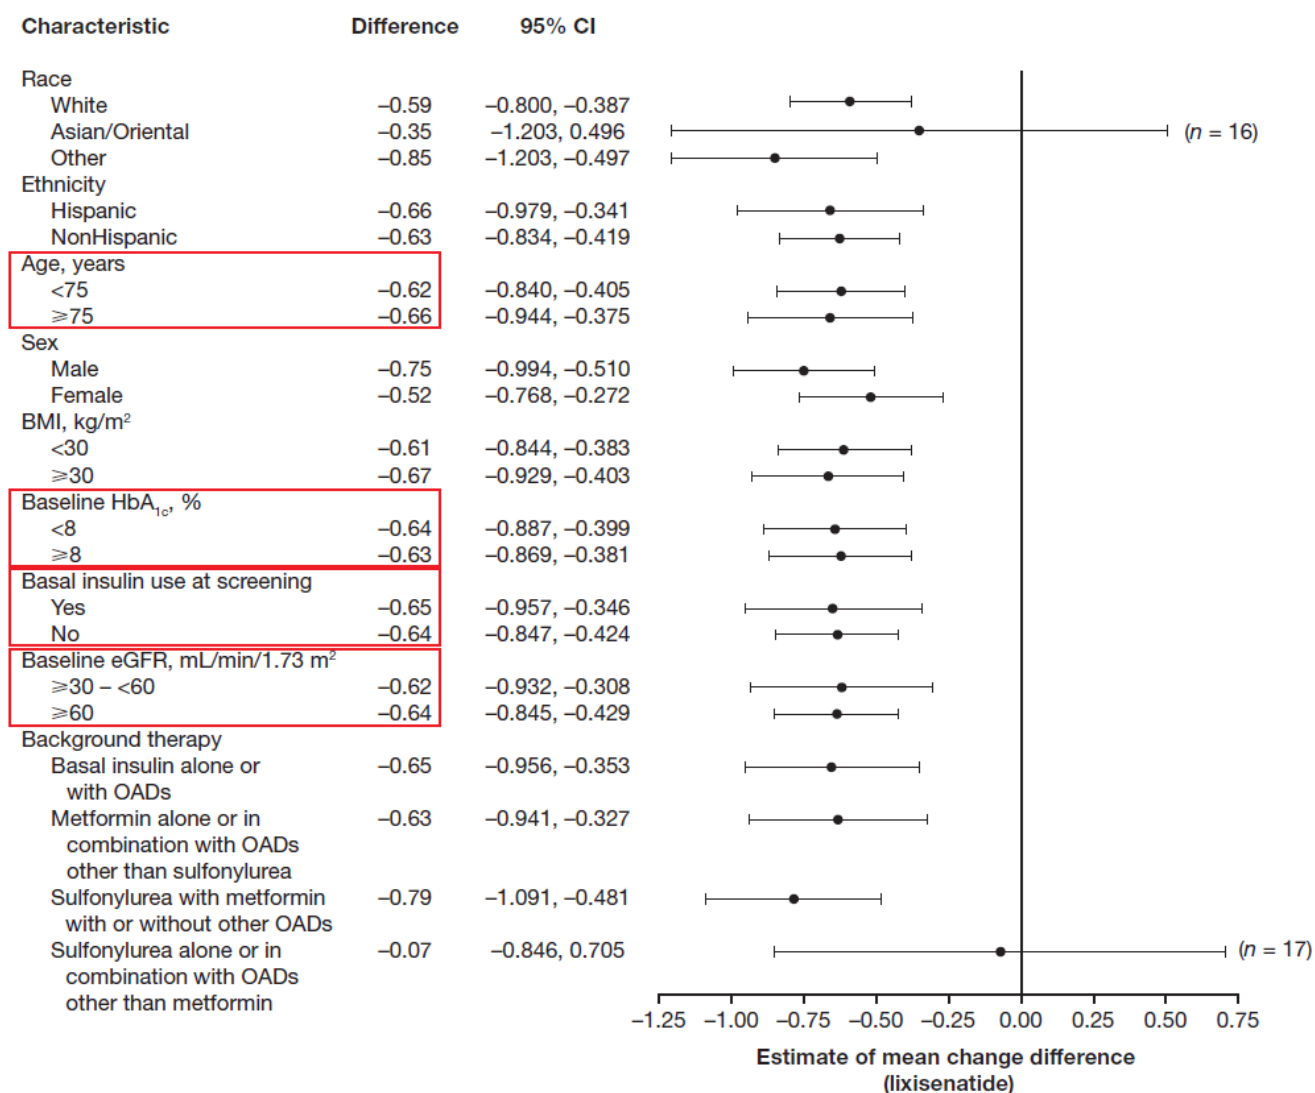

SUPPLEMENTARY DATA

**Supplementary Figure 4**—Incidence of (A) nausea and (B) vomiting by week during the on-treatment period.

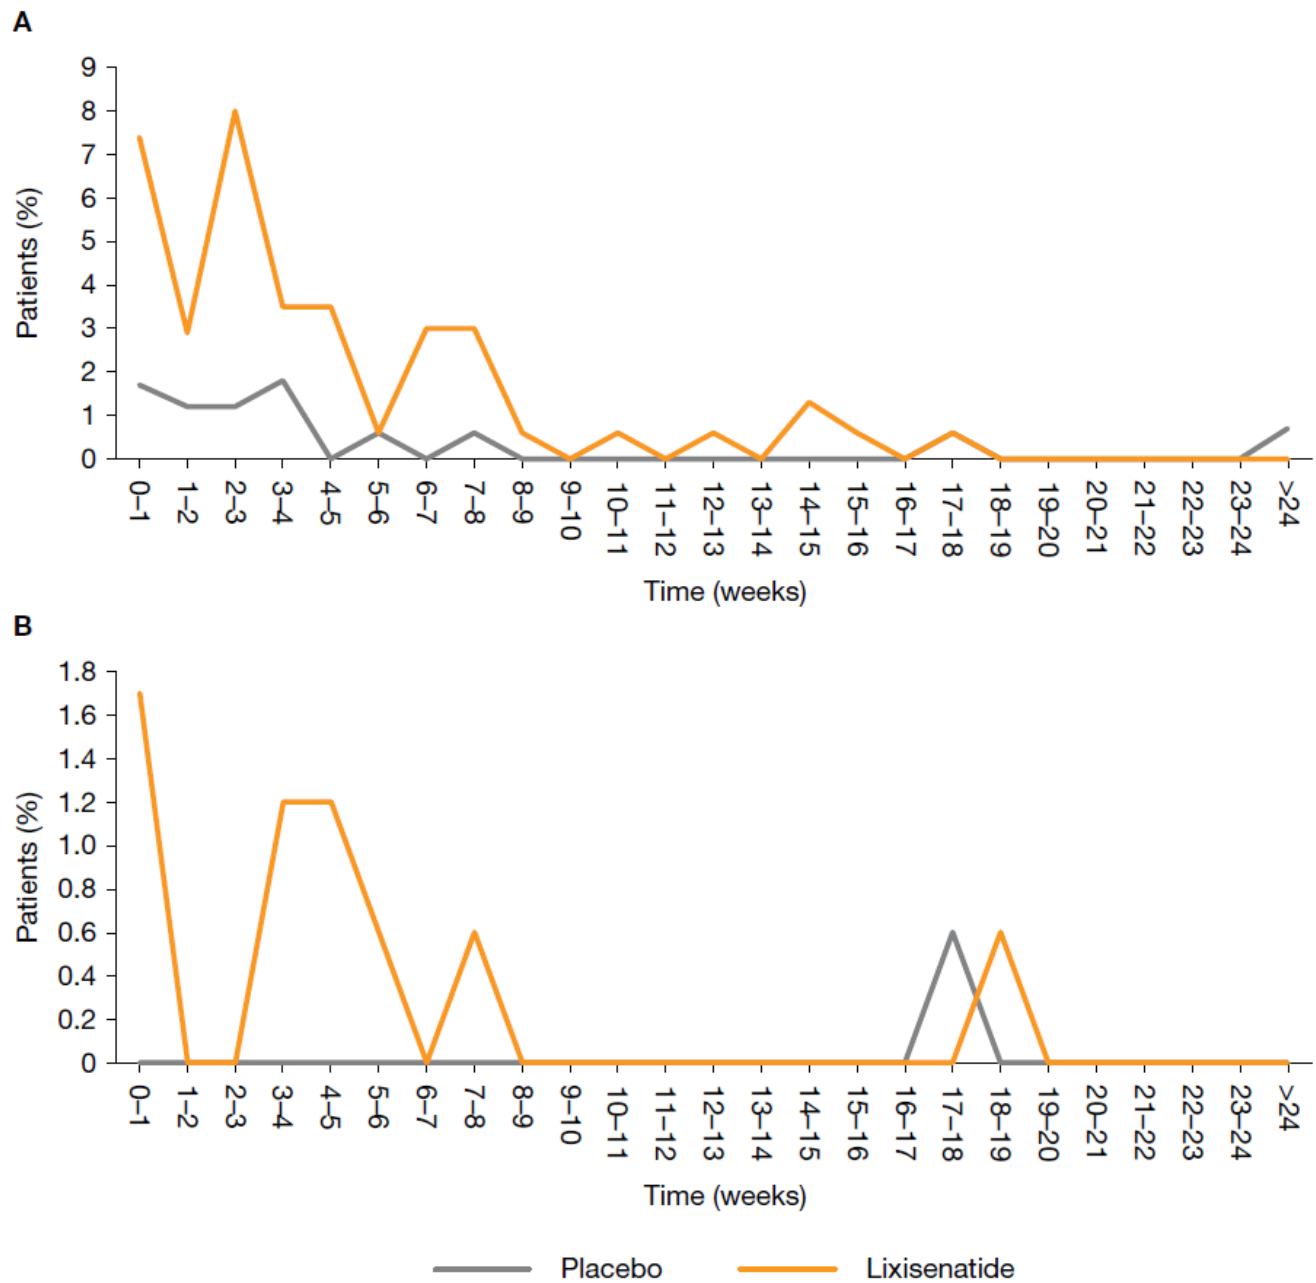

# SUPPLEMENTARY DATA

**Supplementary Table 1**—Number of patients in the safety population reporting treatment-emergent adverse events

| Patients with:                                        | Placebo<br>( <i>n</i> = 174) | Lixisenatide<br>( <i>n</i> = 176) |
|-------------------------------------------------------|------------------------------|-----------------------------------|
| <i>At least one TEAE</i>                              |                              |                                   |
| Any TEAE                                              | 118 (67.8)                   | 125 (71.0)                        |
| Serious TEAE                                          | 10 (5.7)                     | 8 (4.5)                           |
| TEAE leading to death                                 | 1 (0.6)                      | 0 (0.0)                           |
| TEAE leading to discontinuation                       | 10 (5.7)                     | 15 (8.5)                          |
| <i>AE by organ class</i>                              |                              |                                   |
| Infections and infestations                           | 53 (30.5)                    | 41 (23.3)                         |
| Nervous system disorders                              | 19 (10.9)                    | 21 (11.9)                         |
| Gastrointestinal disorders (overall)                  | 36 (20.7)                    | 71 (40.3)                         |
| Nausea                                                | 13 (7.5)                     | 44 (25.0)                         |
| Vomiting                                              | 1 (0.6)                      | 10 (5.7)                          |
| Diarrhea                                              | 13 (7.5)                     | 19 (10.8)                         |
| Gastrointestinal disorders leading to discontinuation | 1 (0.6)                      | 10 (5.7)                          |
| Musculoskeletal and connective tissue disorders       | 31 (17.8)                    | 19 (10.8)                         |
| Arthralgia                                            | 8 (4.6)                      | 4 (2.3)                           |
| Musculoskeletal pain                                  | 7 (4.0)                      | 0 (0.0)                           |
| Hypoglycemia                                          |                              |                                   |
| Any hypoglycemia*                                     | 18 (10.3)                    | 31 (17.6)                         |
| Symptomatic hypoglycemia                              |                              |                                   |
| Number of patients with events                        | 10 (5.7)                     | 13 (7.4)                          |
| Number of events                                      | 12                           | 33                                |
| Blood glucose <3.3 mmol/L                             |                              |                                   |
| Number of patients with events                        | 10 (5.7)                     | 12 (6.8)                          |

Data are presented as *n* (%) unless stated otherwise.

\*Symptomatic + asymptomatic (plasma glucose ≤3.9 mmol/L).

AE, adverse event; TEAE, treatment-emergent adverse event.

# SUPPLEMENTARY DATA

**Supplementary Table 2**—Summary of hypoglycemia with typical symptoms and plasma glucose  $\leq 70$  mg/dL ( $< 3.9$  mmol/L) during the on-treatment period (safety population)

| Type                                                  | Placebo ( <i>n</i> = 174) | Lixisenatide ( <i>n</i> = 176) |
|-------------------------------------------------------|---------------------------|--------------------------------|
| Total patient years                                   | 77.3                      | 76.9                           |
| Number of patients with events, <i>n</i> (%)          | 13 (7.5)                  | 19 (10.8)                      |
| Number of patients with events per 100 patient-years* | 16.81                     | 24.72                          |
| Number of events                                      | 28                        | 47                             |
| Number of events per 100 patient-years <sup>†</sup>   | 36.20                     | 61.15                          |

\*Calculated as: (number of patients with events  $\times$  100 divided by total exposure + 3 days in patient years).

<sup>†</sup>Calculated as (number of events  $\times$  100 divided by total exposure + 3 days in patient years).

# SUPPLEMENTARY DATA

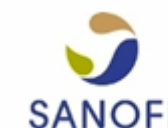

## LIST OF PRINCIPAL INVESTIGATOR(S) AND SUB-INVESTIGATOR(S) PER STUDY SITE WHERE PATIENTS WERE ENROLLED

QSD-002219

|               |         |             |          |
|---------------|---------|-------------|----------|
| Product Code: | AVE0010 | Study Code: | EFC12703 |
|---------------|---------|-------------|----------|

### List of Principal Investigator(s) and Sub-Investigator(s) per study site where patients were enrolled

| Study Center No. | Investigator last name and first name* | Role in the Investigation                     | Professional Degree(s) | Institutional Affiliation(s)                                                                                                                 |
|------------------|----------------------------------------|-----------------------------------------------|------------------------|----------------------------------------------------------------------------------------------------------------------------------------------|
| 036001           | Price Sarah                            | Sub-Investigator/Co-Investigator              | MD                     | Heidelberg Repatriation Hospital<br>Department of Medicine<br>Building 24, 300 Waterdale Road<br>Heidelberg<br>3081<br>Victoria<br>AUSTRALIA |
| 036001           | Proietto Joseph                        | Principal Investigator                        | MD                     | Heidelberg Repatriation Hospital<br>Department of Medicine<br>Building 24, 300 Waterdale Road<br>Heidelberg<br>3081<br>Victoria<br>AUSTRALIA |
| 036001           | Sumithran Priyadarsini K.              | Sub-Investigator/Co-Investigator RDC Approver | MD                     | Heidelberg Repatriation Hospital<br>Department of Medicine<br>Building 24, 300 Waterdale Road<br>Heidelberg<br>3081<br>Victoria<br>AUSTRALIA |

\*CV provided as attachment to this appendix for all principal investigators

Ensure that the printed copy of this document is the current version available on the Intranet.

Property of the sanofi-aventis group - strictly confidential

# SUPPLEMENTARY DATA

| LIST OF PRINCIPAL INVESTIGATOR(S) AND SUB-INVESTIGATOR(S) PER STUDY SITE WHERE PATIENTS WERE ENROLLED |                                        |                                               |                        |                                                                                                                                              |
|-------------------------------------------------------------------------------------------------------|----------------------------------------|-----------------------------------------------|------------------------|----------------------------------------------------------------------------------------------------------------------------------------------|
| QSD-002219                                                                                            |                                        |                                               |                        |                                                                                                                                              |
| Product Code:                                                                                         | AVE0010                                | Study Code:                                   | EFC12703               |                                                                                                                                              |
| Study Center No.                                                                                      | Investigator last name and first name* | Role in the Investigation                     | Professional Degree(s) | Institutional Affiliation(s)                                                                                                                 |
| 036001                                                                                                | Sandra Neoh                            | Sub-Investigator/Co-Investigator RDC Approver | MD                     | Heidelberg Repatriation Hospital<br>Department of Medicine<br>Building 24, 300 Waterdale Road<br>Heidelberg<br>3081<br>Victoria<br>AUSTRALIA |
| 036002                                                                                                | Gilfillan Christopher P.               | Sub-Investigator/Co-Investigator              | MD                     | Box Hill Hospital<br>Endocrinology Department<br>Nelson Road<br>Box Hill<br>3128<br>Victoria<br>AUSTRALIA                                    |
| 036002                                                                                                | Goh Sue L.                             | Sub-Investigator/Co-Investigator              | MD                     | Box Hill Hospital<br>Endocrinology Department<br>Nelson Road<br>Box Hill<br>3128<br>Victoria<br>AUSTRALIA                                    |

\*CV provided as attachment to this appendix for all principal investigators

*Ensure that the printed copy of this document is the current version available on the Intranet.*

Property of the sanofi-aventis group - strictly confidential



# SUPPLEMENTARY DATA

| LIST OF PRINCIPAL INVESTIGATOR(S) AND SUB-INVESTIGATOR(S) PER STUDY SITE WHERE PATIENTS WERE ENROLLED |                                        |                                               |                        |                                                                                                                           |
|-------------------------------------------------------------------------------------------------------|----------------------------------------|-----------------------------------------------|------------------------|---------------------------------------------------------------------------------------------------------------------------|
| QSD-002219                                                                                            |                                        |                                               |                        |                                                                                                                           |
| Product Code:                                                                                         | AVE0010                                | Study Code:                                   | EFC12703               |                                                                                                                           |
| Study Center No.                                                                                      | Investigator last name and first name* | Role in the Investigation                     | Professional Degree(s) | Institutional Affiliation(s)                                                                                              |
| 036002                                                                                                | Kalra Balvinder                        | Sub-Investigator/Co-Investigator              | MD                     | Box Hill Hospital<br>Endocrinology Department<br>Nelson Road<br>Box Hill<br>3128<br>Victoria<br>AUSTRALIA                 |
| 036002                                                                                                | Simpson Richard W.                     | Principal Investigator                        | MD                     | Box Hill Hospital<br>Endocrinology Department<br>Nelson Road<br>Box Hill<br>3128<br>Victoria<br>AUSTRALIA                 |
| 036003                                                                                                | Colman Peter G.                        | Sub-Investigator/Co-Investigator RDC Approver | MD                     | Royal Melbourne Hospital<br>Endocrine/Diabetes/Metabolism<br>Grattan Street<br>Parkville<br>3050<br>Victoria<br>AUSTRALIA |

\*CV provided as attachment to this appendix for all principal investigators

*Ensure that the printed copy of this document is the current version available on the Intranet.*

Property of the sanofi-aventis group - strictly confidential

# SUPPLEMENTARY DATA

| LIST OF PRINCIPAL INVESTIGATOR(S) AND SUB-INVESTIGATOR(S) PER STUDY SITE WHERE PATIENTS WERE ENROLLED |                                        |                                  |                        |                                                                                                                           |
|-------------------------------------------------------------------------------------------------------|----------------------------------------|----------------------------------|------------------------|---------------------------------------------------------------------------------------------------------------------------|
| QSD-002219                                                                                            |                                        |                                  |                        |                                                                                                                           |
| Product Code:                                                                                         | AVE0010                                | Study Code:                      | EFC12703               |                                                                                                                           |
| Study Center No.                                                                                      | Investigator last name and first name* | Role in the Investigation        | Professional Degree(s) | Institutional Affiliation(s)                                                                                              |
| 036003                                                                                                | Fourlanos Spiros                       | Sub-Investigator/Co-Investigator | MD                     | Royal Melbourne Hospital<br>Endocrine/Diabetes/Metabolism<br>Grattan Street<br>Parkville<br>3050<br>Victoria<br>AUSTRALIA |
| 036003                                                                                                | Nankervis Alison J.                    | Principal Investigator           | MD                     | Royal Melbourne Hospital<br>Endocrine/Diabetes/Metabolism<br>Grattan Street<br>Parkville<br>3050<br>Victoria<br>AUSTRALIA |
| 036003                                                                                                | Kvi Mervyn                             | Sub-Investigator/Co-Investigator | MD                     | Royal Melbourne Hospital<br>Endocrine/Diabetes/Metabolism<br>Grattan Street<br>Parkville<br>3050<br>Victoria<br>AUSTRALIA |

\*CV provided as attachment to this appendix for all principal investigators

*Ensure that the printed copy of this document is the current version available on the Intranet.*

Property of the sanofi-aventis group - strictly confidential

# SUPPLEMENTARY DATA

| LIST OF PRINCIPAL INVESTIGATOR(S) AND SUB-INVESTIGATOR(S) PER STUDY SITE WHERE PATIENTS WERE ENROLLED |                                        |                                  |                        |                                                                                                                                              |
|-------------------------------------------------------------------------------------------------------|----------------------------------------|----------------------------------|------------------------|----------------------------------------------------------------------------------------------------------------------------------------------|
| QSD-002219                                                                                            |                                        |                                  |                        |                                                                                                                                              |
| Product Code:                                                                                         | AVE0010                                | Study Code:                      | EFC12703               |                                                                                                                                              |
| Study Center No.                                                                                      | Investigator last name and first name* | Role in the Investigation        | Professional Degree(s) | Institutional Affiliation(s)                                                                                                                 |
| 036003                                                                                                | Nguyen Hanh                            | Sub-Investigator/Co-Investigator | MD                     | Royal Melbourne Hospital<br>Endocrine/Diabetes/Metabolism<br>Grattan Street<br>Parkville<br>3050<br>Victoria<br>AUSTRALIA                    |
| 036004                                                                                                | Ho Jean P.                             | Sub-Investigator/Co-Investigator | MD                     | Royal Prince Alfred Hospital<br>Diabetes Centre<br>Level 6 West Wing<br>Missenden Road<br>Camperdown<br>2050<br>New South Wales<br>AUSTRALIA |
| 036004                                                                                                | Ross Glynis                            | Sub-Investigator/Co-Investigator | MD                     | Royal Prince Alfred Hospital<br>Diabetes Centre<br>Level 6 West Wing<br>Missenden Road<br>Camperdown<br>2050<br>New South Wales<br>AUSTRALIA |

\*CV provided as attachment to this appendix for all principal investigators

*Ensure that the printed copy of this document is the current version available on the Intranet.*

Property of the sanofi-aventis group - strictly confidential

# SUPPLEMENTARY DATA

| LIST OF PRINCIPAL INVESTIGATOR(S) AND SUB-INVESTIGATOR(S) PER STUDY SITE WHERE PATIENTS WERE ENROLLED |                                        |                                               |                        |                                                                                                                                              |
|-------------------------------------------------------------------------------------------------------|----------------------------------------|-----------------------------------------------|------------------------|----------------------------------------------------------------------------------------------------------------------------------------------|
| QSD-002219                                                                                            |                                        |                                               |                        |                                                                                                                                              |
| Product Code:                                                                                         | AVE0010                                | Study Code:                                   | EFC12703               |                                                                                                                                              |
| Study Center No.                                                                                      | Investigator last name and first name* | Role in the Investigation                     | Professional Degree(s) | Institutional Affiliation(s)                                                                                                                 |
| 036004                                                                                                | Wong Jencia                            | Sub-Investigator/Co-Investigator RDC Approver | MD                     | Royal Prince Alfred Hospital<br>Diabetes Centre<br>Level 6 West Wing<br>Missenden Road<br>Camperdown<br>2050<br>New South Wales<br>AUSTRALIA |
| 036004                                                                                                | Wu Ted                                 | Sub-Investigator/Co-Investigator RDC Approver | MD, PhD                | Royal Prince Alfred Hospital<br>Diabetes Centre<br>Level 6 West Wing<br>Missenden Road<br>Camperdown<br>2050<br>New South Wales<br>AUSTRALIA |
| 036004                                                                                                | Yue Dennis                             | Principal Investigator                        | MD                     | Royal Prince Alfred Hospital<br>Diabetes Centre<br>Level 6 West Wing<br>Missenden Road<br>Camperdown<br>2050<br>New South Wales<br>AUSTRALIA |

\*CV provided as attachment to this appendix for all principal investigators

*Ensure that the printed copy of this document is the current version available on the Intranet.*

Property of the sanofi-aventis group - strictly confidential

# SUPPLEMENTARY DATA

| LIST OF PRINCIPAL INVESTIGATOR(S) AND SUB-INVESTIGATOR(S) PER STUDY SITE WHERE PATIENTS WERE ENROLLED |                                        |                                               |                        |                                                                                                                |
|-------------------------------------------------------------------------------------------------------|----------------------------------------|-----------------------------------------------|------------------------|----------------------------------------------------------------------------------------------------------------|
| QSD-002219                                                                                            |                                        |                                               |                        |                                                                                                                |
| Product Code:                                                                                         | AVE0010                                | Study Code:                                   | EFC12703               |                                                                                                                |
| Study Center No.                                                                                      | Investigator last name and first name* | Role in the Investigation                     | Professional Degree(s) | Institutional Affiliation(s)                                                                                   |
| 036005                                                                                                | Feddersen Martin A.                    | Sub-Investigator/Co-Investigator RDC Approver | MD                     | Renal Rsearch<br>Level 1 / 37 William Street<br>Gosford<br>2250<br>New South Wales<br>AUSTRALIA                |
| 036005                                                                                                | Roger Simon D.                         | Principal Investigator                        | MD                     | Renal Rsearch<br>Level 1 / 37 William Street<br>Gosford<br>2250<br>New South Wales<br>AUSTRALIA                |
| 036006                                                                                                | Blom Hans                              | Principal Investigator                        | MD                     | Vale Medical Practice<br>Brookvale House, 1A Cross Street<br>Brookvale<br>2100<br>New South Wales<br>AUSTRALIA |
| 036006                                                                                                | Gordon Evan                            | Sub-Investigator/Co-Investigator              | MD                     | Vale Medical Practice<br>Brookvale House, 1A Cross Street<br>Brookvale<br>2100<br>New South Wales<br>AUSTRALIA |

\*CV provided as attachment to this appendix for all principal investigators

*Ensure that the printed copy of this document is the current version available on the Intranet.*

Property of the sanofi-aventis group - strictly confidential

# SUPPLEMENTARY DATA

| LIST OF PRINCIPAL INVESTIGATOR(S) AND SUB-INVESTIGATOR(S) PER STUDY SITE WHERE PATIENTS WERE ENROLLED |                                        |                                               |                        |                                                                                                                |
|-------------------------------------------------------------------------------------------------------|----------------------------------------|-----------------------------------------------|------------------------|----------------------------------------------------------------------------------------------------------------|
| QSD-002219                                                                                            |                                        |                                               |                        |                                                                                                                |
| Product Code:                                                                                         | AVE0010                                | Study Code:                                   | EFC12703               |                                                                                                                |
| Study Center No.                                                                                      | Investigator last name and first name* | Role in the Investigation                     | Professional Degree(s) | Institutional Affiliation(s)                                                                                   |
| 036006                                                                                                | Kailainathan Mangalaeswari             | Sub-Investigator/Co-Investigator RDC Approver | MD                     | Vale Medical Practice<br>Brookvale House, 1A Cross Street<br>Brookvale<br>2100<br>New South Wales<br>AUSTRALIA |
| 036006                                                                                                | Moss David                             | Sub-Investigator/Co-Investigator              | MD                     | Vale Medical Practice<br>Brookvale House, 1A Cross Street<br>Brookvale<br>2100<br>New South Wales<br>AUSTRALIA |
| 100001                                                                                                | Kerekovski Yuriy                       | Sub-Investigator/Co-Investigator              | MD                     | Diagnostic Consultative Center "Equita" EOOD<br>5, Tsar Osvoboditel Blvd.<br>Varna<br>9000<br>BULGARIA         |
| 100001                                                                                                | <a href="#">Klyuchkova Neli</a>        | Principal Investigator                        | MD                     | Diagnostic Consultative Center "Equita" EOOD<br>5, Tsar Osvoboditel Blvd.<br>Varna<br>9000<br>BULGARIA         |
| 100001                                                                                                | Lyubomirova Zornitsa                   | Sub-Investigator/Co-Investigator              | MD                     | Diagnostic Consultative Center "Equita" EOOD<br>5, Tsar Osvoboditel Blvd.<br>Varna<br>9000<br>BULGARIA         |

\*CV provided as attachment to this appendix for all principal investigators

*Ensure that the printed copy of this document is the current version available on the Intranet.*

Property of the sanofi-aventis group - strictly confidential

# SUPPLEMENTARY DATA

| LIST OF PRINCIPAL INVESTIGATOR(S) AND SUB-INVESTIGATOR(S) PER STUDY SITE WHERE PATIENTS WERE ENROLLED |                                        |                                  |                        |                                                                                                                 |
|-------------------------------------------------------------------------------------------------------|----------------------------------------|----------------------------------|------------------------|-----------------------------------------------------------------------------------------------------------------|
| QSD-002219                                                                                            |                                        |                                  |                        |                                                                                                                 |
| Product Code:                                                                                         | AVE0010                                | Study Code:                      | EFC12703               |                                                                                                                 |
| Study Center No.                                                                                      | Investigator last name and first name* | Role in the Investigation        | Professional Degree(s) | Institutional Affiliation(s)                                                                                    |
| 100002                                                                                                | Videva-Vlahova Vyara                   | Principal Investigator           | MD                     | MHAT "Zdrave" OOD<br>Internal Department<br>1A Perushtitsa Str.<br>Plovdiv<br>4002<br>BULGARIA                  |
| 100002                                                                                                | Vlahov Petar                           | Sub-Investigator/Co-Investigator | MD                     | MHAT "Zdrave" OOD<br>Internal Department<br>1A Perushtitsa Str.<br>Plovdiv<br>4002<br>BULGARIA                  |
| 100003                                                                                                | Damyanov Ivan                          | Sub-Investigator/Co-Investigator | MD                     | MHAT 'Doverie'<br>Endocrinology cabinet Ovcha kupel 2<br>2, Fridrih Gryunanger Str<br>Sofia<br>1632<br>BULGARIA |
| 100003                                                                                                | Damyanova Velichka A.                  | Principal Investigator           | MD                     | MHAT 'Doverie'<br>Endocrinology cabinet Ovcha kupel 2<br>2, Fridrih Gryunanger Str<br>Sofia<br>1632<br>BULGARIA |

\*CV provided as attachment to this appendix for all principal investigators

*Ensure that the printed copy of this document is the current version available on the Intranet.*

Property of the sanofi-aventis group - strictly confidential

# SUPPLEMENTARY DATA

| LIST OF PRINCIPAL INVESTIGATOR(S) AND SUB-INVESTIGATOR(S) PER STUDY SITE WHERE PATIENTS WERE ENROLLED |                                        |                                  |                        |                                                                                                                 |
|-------------------------------------------------------------------------------------------------------|----------------------------------------|----------------------------------|------------------------|-----------------------------------------------------------------------------------------------------------------|
| QSD-002219                                                                                            |                                        |                                  |                        |                                                                                                                 |
| Product Code:                                                                                         | AVE0010                                | Study Code:                      | EFC12703               |                                                                                                                 |
| Study Center No.                                                                                      | Investigator last name and first name* | Role in the Investigation        | Professional Degree(s) | Institutional Affiliation(s)                                                                                    |
| 100003                                                                                                | Pasheva Vasilka                        | Sub-Investigator/Co-Investigator | MD                     | MHAT 'Doverie'<br>Endocrinology cabinet Ovcha kupel 2<br>2, Fridrih Gryunanger Str<br>Sofia<br>1632<br>BULGARIA |
| 100004                                                                                                | Nikolaeva Antoaneta Z.                 | Sub-Investigator/Co-Investigator | MD                     | MHAT "Prof Stoyan Kirkovich"<br>2, General Stoletov St.<br>Stara Zagora<br>6000<br>BULGARIA                     |
| 100004                                                                                                | Vuchkova Emilena                       | Principal Investigator           | MD                     | MHAT "Prof Stoyan Kirkovich"<br>2, General Stoletov St.<br>Stara Zagora<br>6000<br>BULGARIA                     |
| 100005                                                                                                | Mitkov Mitko                           | Principal Investigator           | MD                     | MHAT Sveti Georgi<br>Clinic of Endocrinology<br>15a, Vasil Aprilov<br>Plovdiv<br>4002<br>BULGARIA               |

\*CV provided as attachment to this appendix for all principal investigators

*Ensure that the printed copy of this document is the current version available on the Intranet.*

Property of the sanofi-aventis group - strictly confidential



# SUPPLEMENTARY DATA

| LIST OF PRINCIPAL INVESTIGATOR(S) AND SUB-INVESTIGATOR(S) PER STUDY SITE WHERE PATIENTS WERE ENROLLED |                                        |                                             |                        |                                                                                                                         |
|-------------------------------------------------------------------------------------------------------|----------------------------------------|---------------------------------------------|------------------------|-------------------------------------------------------------------------------------------------------------------------|
| QSD-002219                                                                                            |                                        |                                             |                        |                                                                                                                         |
| Product Code:                                                                                         | AVE0010                                | Study Code:                                 | EFC12703               |                                                                                                                         |
| Study Center No.                                                                                      | Investigator last name and first name* | Role in the Investigation                   | Professional Degree(s) | Institutional Affiliation(s)                                                                                            |
| 100005                                                                                                | Nonchev Boyan                          | Sub-Investigator/Co-Investigator RDC Writer | MD                     | MHAT Sveti Georgi<br>Clinic of Endocrinology<br>15a, Vasil Aprilov<br>Plovdiv<br>4002<br>BULGARIA                       |
| 124001                                                                                                | Beauchesne André                       | Sub-Investigator/Co-Investigator            | MD                     | Pro-Recherche<br>Polyclinique des Ponts<br>120 - 1110 Boul. De La Rive-Sud<br>St-Romuald<br>G6W 5M6<br>Quebec<br>CANADA |
| 124001                                                                                                | Blouin François                        | Principal Investigator                      | MD                     | Pro-Recherche<br>Polyclinique des Ponts<br>120 - 1110 Boul. De La Rive-Sud<br>St-Romuald<br>G6W 5M6<br>Quebec<br>CANADA |
| 124001                                                                                                | Vallieres Gerald                       | Sub-Investigator/Co-Investigator            | MD                     | Pro-Recherche<br>Polyclinique des Ponts<br>120 - 1110 Boul. De La Rive-Sud<br>St-Romuald<br>G6W 5M6<br>Quebec<br>CANADA |

\*CV provided as attachment to this appendix for all principal investigators

*Ensure that the printed copy of this document is the current version available on the Intranet.*

Property of the sanofi-aventis group - strictly confidential

# SUPPLEMENTARY DATA

| LIST OF PRINCIPAL INVESTIGATOR(S) AND SUB-INVESTIGATOR(S) PER STUDY SITE WHERE PATIENTS WERE ENROLLED |                                        |                                  |                        |                                                                                           |
|-------------------------------------------------------------------------------------------------------|----------------------------------------|----------------------------------|------------------------|-------------------------------------------------------------------------------------------|
| QSD-002219                                                                                            |                                        |                                  |                        |                                                                                           |
| Product Code:                                                                                         | AVE0010                                | Study Code:                      | EFC12703               |                                                                                           |
| Study Center No.                                                                                      | Investigator last name and first name* | Role in the Investigation        | Professional Degree(s) | Institutional Affiliation(s)                                                              |
| 124002                                                                                                | Baillargeon Jean Patrice               | Sub-Investigator/Co-Investigator | MD                     | CHUS Hôpital Fleurimont<br>3001-12e Ave Nord<br>Sherbrooke<br>J1H 5N4<br>Quebec<br>CANADA |
| 124002                                                                                                | Bellabarba Diego                       | Sub-Investigator/Co-Investigator | MD                     | CHUS Hôpital Fleurimont<br>3001-12e Ave Nord<br>Sherbrooke<br>J1H 5N4<br>Quebec<br>CANADA |
| 124002                                                                                                | Bernier Frederic                       | Sub-Investigator/Co-Investigator | MD                     | CHUS Hôpital Fleurimont<br>3001-12e Ave Nord<br>Sherbrooke<br>J1H 5N4<br>Quebec<br>CANADA |
| 124002                                                                                                | Carpentier Andre                       | Sub-Investigator/Co-Investigator | MD                     | CHUS Hôpital Fleurimont<br>3001-12e Ave Nord<br>Sherbrooke<br>J1H 5N4<br>Quebec<br>CANADA |

\*CV provided as attachment to this appendix for all principal investigators

*Ensure that the printed copy of this document is the current version available on the Intranet.*

Property of the sanofi-aventis group - strictly confidential

# SUPPLEMENTARY DATA

| LIST OF PRINCIPAL INVESTIGATOR(S) AND SUB-INVESTIGATOR(S) PER STUDY SITE WHERE PATIENTS WERE ENROLLED |                                        |                                  |                        |                                                                                           |
|-------------------------------------------------------------------------------------------------------|----------------------------------------|----------------------------------|------------------------|-------------------------------------------------------------------------------------------|
| QSD-002219                                                                                            |                                        |                                  |                        |                                                                                           |
| Product Code:                                                                                         | AVE0010                                | Study Code:                      | EFC12703               |                                                                                           |
| Study Center No.                                                                                      | Investigator last name and first name* | Role in the Investigation        | Professional Degree(s) | Institutional Affiliation(s)                                                              |
| 124002                                                                                                | Hivert Marie-France                    | Sub-Investigator/Co-Investigator | MD                     | CHUS Hôpital Fleurimont<br>3001-12e Ave Nord<br>Sherbrooke<br>J1H 5N4<br>Quebec<br>CANADA |
| 124002                                                                                                | Houde Ghislaine                        | Sub-Investigator/Co-Investigator | MD                     | CHUS Hôpital Fleurimont<br>3001-12e Ave Nord<br>Sherbrooke<br>J1H 5N4<br>Quebec<br>CANADA |
| 124002                                                                                                | Langlois Marie-France                  | Sub-Investigator/Co-Investigator | MD                     | CHUS Hôpital Fleurimont<br>3001-12e Ave Nord<br>Sherbrooke<br>J1H 5N4<br>Quebec<br>CANADA |
| 124002                                                                                                | Perron Patrice                         | Principal Investigator           | MD                     | CHUS Hôpital Fleurimont<br>3001-12e Ave Nord<br>Sherbrooke<br>J1H 5N4<br>Quebec<br>CANADA |

\*CV provided as attachment to this appendix for all principal investigators

*Ensure that the printed copy of this document is the current version available on the Intranet.*

Property of the sanofi-aventis group - strictly confidential

# SUPPLEMENTARY DATA

| LIST OF PRINCIPAL INVESTIGATOR(S) AND SUB-INVESTIGATOR(S) PER STUDY SITE WHERE PATIENTS WERE ENROLLED |                                        |                                  |                        |                                                                                                      |
|-------------------------------------------------------------------------------------------------------|----------------------------------------|----------------------------------|------------------------|------------------------------------------------------------------------------------------------------|
| QSD-002219                                                                                            |                                        |                                  |                        |                                                                                                      |
| Product Code:                                                                                         |                                        | Study Code:                      |                        |                                                                                                      |
| AVE0010                                                                                               |                                        | EFC12703                         |                        |                                                                                                      |
| Study Center No.                                                                                      | Investigator last name and first name* | Role in the Investigation        | Professional Degree(s) | Institutional Affiliation(s)                                                                         |
| 124002                                                                                                | Pesant Marie-Helene                    | Sub-Investigator/Co-Investigator | MD                     | CHUS Hôpital Fleurimont<br>3001-12e Ave Nord<br>Sherbrooke<br>J1H 5N4<br>Quebec<br>CANADA            |
| 124002                                                                                                | VanRossum Nicole                       | Sub-Investigator/Co-Investigator | MD                     | CHUS Hôpital Fleurimont<br>3001-12e Ave Nord<br>Sherbrooke<br>J1H 5N4<br>Quebec<br>CANADA            |
| 124002                                                                                                | Daniel Tessier                         | Sub-Investigator/Co-Investigator | MD                     | CHUS Hôpital Fleurimont<br>3001-12e Ave Nord<br>Sherbrooke<br>J1H 5N4<br>Quebec<br>CANADA            |
| 124003                                                                                                | Greenspoon Allen                       | Sub-Investigator/Co-Investigator | MD                     | Wharton Medical Clinic<br>414 Victoria Ave. N. Suite M14<br>Hamilton<br>L8L 5G8<br>Ontario<br>CANADA |

\*CV provided as attachment to this appendix for all principal investigators

*Ensure that the printed copy of this document is the current version available on the Intranet.*

Property of the sanofi-aventis group - strictly confidential

# SUPPLEMENTARY DATA

| LIST OF PRINCIPAL INVESTIGATOR(S) AND SUB-INVESTIGATOR(S) PER STUDY SITE WHERE PATIENTS WERE ENROLLED |                                        |                                  |                        |                                                                                                                           |
|-------------------------------------------------------------------------------------------------------|----------------------------------------|----------------------------------|------------------------|---------------------------------------------------------------------------------------------------------------------------|
| QSD-002219                                                                                            |                                        |                                  |                        |                                                                                                                           |
| Product Code:                                                                                         |                                        | Study Code:                      |                        |                                                                                                                           |
| AVE0010                                                                                               |                                        | EFC12703                         |                        |                                                                                                                           |
| Study Center No.                                                                                      | Investigator last name and first name* | Role in the Investigation        | Professional Degree(s) | Institutional Affiliation(s)                                                                                              |
| 124003                                                                                                | Wharton Sean                           | Principal Investigator           | MD                     | Wharton Medical Clinic<br>414 Victoria Ave. N. Suite M14<br>Hamilton<br>L8L 5G8<br>Ontario<br>CANADA                      |
| 124004                                                                                                | Woo Vincent C.                         | Principal Investigator           | MD                     | Health Sciences Centre<br>Diabetes Research Group<br>838-715 McDermot Avenue<br>Winnipeg<br>R3E 3P4<br>Manitoba<br>CANADA |
| 124004                                                                                                | Carmen Hurd                            | Sub-Investigator/Co-Investigator | MD                     | Health Sciences Centre<br>Diabetes Research Group<br>838-715 McDermot Avenue<br>Winnipeg<br>R3E 3P4<br>Manitoba<br>CANADA |
| 124005                                                                                                | Elliott Thomas G.                      | Principal Investigator           | MD                     | BC Diabetes<br>4102 - 2775 Laurel Street<br>Vancouver<br>V5Z 1M9<br>British Columbia<br>CANADA                            |

\*CV provided as attachment to this appendix for all principal investigators

*Ensure that the printed copy of this document is the current version available on the Intranet.*

Property of the sanofi-aventis group - strictly confidential

# SUPPLEMENTARY DATA

| LIST OF PRINCIPAL INVESTIGATOR(S) AND SUB-INVESTIGATOR(S) PER STUDY SITE WHERE PATIENTS WERE ENROLLED |                                        |                                  |                        |                                                                                                                                                      |
|-------------------------------------------------------------------------------------------------------|----------------------------------------|----------------------------------|------------------------|------------------------------------------------------------------------------------------------------------------------------------------------------|
| QSD-002219                                                                                            |                                        |                                  |                        |                                                                                                                                                      |
| Product Code:                                                                                         | AVE0010                                | Study Code:                      | EFC12703               |                                                                                                                                                      |
| Study Center No.                                                                                      | Investigator last name and first name* | Role in the Investigation        | Professional Degree(s) | Institutional Affiliation(s)                                                                                                                         |
| 124005                                                                                                | Paty Breay                             | Sub-Investigator/Co-Investigator | MD                     | BC Diabetes<br>4102 - 2775 Laurel Street<br>Vancouver<br>V5Z 1M9<br>British Columbia<br>CANADA                                                       |
| 124006                                                                                                | Meneilly Graydon                       | Principal Investigator           | MD                     | VCHRI Clinical Research Unit<br>4th Floor, 2775 Laurel Street<br>Vancouver<br>V5Z 1M9<br>British Columbia<br>CANADA                                  |
| 124006                                                                                                | Keneneth Madden M.                     | Sub-Investigator/Co-Investigator | MD                     | VCHRI Clinical Research Unit<br>4th Floor, 2775 Laurel Street<br>Vancouver<br>V5Z 1M9<br>British Columbia<br>CANADA                                  |
| 124007                                                                                                | Partha Paul                            | Principal Investigator           | MD                     | Pharmaceutical Integrated Research Corp (PIRC)<br>A division of the AIM Health Group<br>458 Central Avenue<br>London<br>N6B 2E5<br>Ontario<br>CANADA |

\*CV provided as attachment to this appendix for all principal investigators

*Ensure that the printed copy of this document is the current version available on the Intranet.*

Property of the sanofi-aventis group - strictly confidential

# SUPPLEMENTARY DATA

| LIST OF PRINCIPAL INVESTIGATOR(S) AND SUB-INVESTIGATOR(S) PER STUDY SITE WHERE PATIENTS WERE ENROLLED |                                        |                                  |                        |                                                                                                                                                      |
|-------------------------------------------------------------------------------------------------------|----------------------------------------|----------------------------------|------------------------|------------------------------------------------------------------------------------------------------------------------------------------------------|
| QSD-002219                                                                                            |                                        |                                  |                        |                                                                                                                                                      |
| Product Code:                                                                                         |                                        | Study Code:                      |                        |                                                                                                                                                      |
| AVE0010                                                                                               |                                        | EFC12703                         |                        |                                                                                                                                                      |
| Study Center No.                                                                                      | Investigator last name and first name* | Role in the Investigation        | Professional Degree(s) | Institutional Affiliation(s)                                                                                                                         |
| 124007                                                                                                | Wahby Robert J.                        | Sub-Investigator/Co-Investigator | MD                     | Pharmaceutical Integrated Research Corp (PIRC)<br>A division of the AIM Health Group<br>458 Central Avenue<br>London<br>N6B 2E3<br>Ontario<br>CANADA |
| 124008                                                                                                | Tsoukas George M.                      | Principal Investigator           | MD                     | Applied Medical Informatics Research Inc.<br>(A.M.I.R)<br>4427 Sherbrooke Street West<br>Westmount<br>H3Z 1E5<br>Quebec<br>CANADA                    |
| 124008                                                                                                | Tsoukas George-Orestis                 | Sub-Investigator/Co-Investigator | MD                     | Applied Medical Informatics Research Inc.<br>(A.M.I.R)<br>4427 Sherbrooke Street West<br>Westmount<br>H3Z 1E5<br>Quebec<br>CANADA                    |
| 208001                                                                                                | Perrild Hans                           | Principal Investigator           | MD                     | Bispebjerg Hospital<br>IC Forskning<br>Bispebjerg Bakke 23<br>København Nv<br>2400<br>DENMARK                                                        |

\*CV provided as attachment to this appendix for all principal investigators

*Ensure that the printed copy of this document is the current version available on the Intranet.*

Property of the sanofi-aventis group - strictly confidential

# SUPPLEMENTARY DATA

| LIST OF PRINCIPAL INVESTIGATOR(S) AND SUB-INVESTIGATOR(S) PER STUDY SITE WHERE PATIENTS WERE ENROLLED |                                        |                                  |                        |                                                                                               |
|-------------------------------------------------------------------------------------------------------|----------------------------------------|----------------------------------|------------------------|-----------------------------------------------------------------------------------------------|
| QSD-002219                                                                                            |                                        |                                  |                        |                                                                                               |
| Product Code:                                                                                         | AVE0010                                | Study Code:                      | EFC12703               |                                                                                               |
| Study Center No.                                                                                      | Investigator last name and first name* | Role in the Investigation        | Professional Degree(s) | Institutional Affiliation(s)                                                                  |
| 208001                                                                                                | Svendsen Ole Lander                    | Sub-Investigator/Co-Investigator | MD                     | Bispebjerg Hospital<br>IC Forskning<br>Bispebjerg Bakke 23<br>København Nv<br>2400<br>DENMARK |
| 208001                                                                                                | Rasmus Bo Jensen                       | Sub-Investigator/Co-Investigator | MD                     | Bispebjerg Hospital<br>IC Forskning<br>Bispebjerg Bakke 23<br>København Nv<br>2400<br>DENMARK |
| 208001                                                                                                | Caroline Raun Hansen                   | Sub-Investigator/Co-Investigator | MD                     | Bispebjerg Hospital<br>IC Forskning<br>Bispebjerg Bakke 23<br>København Nv<br>2400<br>DENMARK |
| 208002                                                                                                | Christensen Peter A.                   | Principal Investigator           | MD                     | Slagelse Sygehus<br>Slagelse Sygehus<br>Ingemannsvej 18<br>Slagelse<br>4200<br>DENMARK        |

\*CV provided as attachment to this appendix for all principal investigators

*Ensure that the printed copy of this document is the current version available on the Intranet.*

Property of the sanofi-aventis group - strictly confidential



# SUPPLEMENTARY DATA

| LIST OF PRINCIPAL INVESTIGATOR(S) AND SUB-INVESTIGATOR(S) PER STUDY SITE WHERE PATIENTS WERE ENROLLED |                                        |                                  |                        |                                                                                                   |
|-------------------------------------------------------------------------------------------------------|----------------------------------------|----------------------------------|------------------------|---------------------------------------------------------------------------------------------------|
| QSD-002219                                                                                            |                                        |                                  |                        |                                                                                                   |
| Product Code:                                                                                         | AVE0010                                | Study Code:                      | EFC12703               |                                                                                                   |
| Study Center No.                                                                                      | Investigator last name and first name* | Role in the Investigation        | Professional Degree(s) | Institutional Affiliation(s)                                                                      |
| 208002                                                                                                | Gæde Peter                             | Sub-Investigator/Co-Investigator | MD                     | Slagelse Sygehus<br>Slagelse Sygehus<br>Ingemannsvej 18<br>Slagelse<br>4200<br>DENMARK            |
| 208002                                                                                                | Henning Juhl F.                        | Principal Investigator           | MD                     | Slagelse Sygehus<br>Slagelse Sygehus<br>Ingemannsvej 18<br>Slagelse<br>4200<br>DENMARK            |
| 208003                                                                                                | Hangaard Joergen                       | Principal Investigator           | MD, PhD                | Sygehus Fyn Svendborg<br>Endokrinologisk Afd.<br>Valdemarsgade 53<br>Svendborg<br>5700<br>DENMARK |
| 208003                                                                                                | Houborg Petersen Maria                 | Sub-Investigator/Co-Investigator | MD                     | Sygehus Fyn Svendborg<br>Endokrinologisk Afd.<br>Valdemarsgade 53<br>Svendborg<br>5700<br>DENMARK |

\*CV provided as attachment to this appendix for all principal investigators

*Ensure that the printed copy of this document is the current version available on the Intranet.*

Property of the sanofi-aventis group - strictly confidential

# SUPPLEMENTARY DATA

| LIST OF PRINCIPAL INVESTIGATOR(S) AND SUB-INVESTIGATOR(S) PER STUDY SITE WHERE PATIENTS WERE ENROLLED |                                        |                                  |                        |                                                                                                     |
|-------------------------------------------------------------------------------------------------------|----------------------------------------|----------------------------------|------------------------|-----------------------------------------------------------------------------------------------------|
| QSD-002219                                                                                            |                                        |                                  |                        |                                                                                                     |
| Product Code:                                                                                         | AVE0010                                | Study Code:                      | EFC12703               |                                                                                                     |
| Study Center No.                                                                                      | Investigator last name and first name* | Role in the Investigation        | Professional Degree(s) | Institutional Affiliation(s)                                                                        |
| 208003                                                                                                | Levin Klaus                            | Sub-Investigator/Co-Investigator | MD                     | Sygehus Fyn Svendborg<br>Endokrinologisk Afd.<br>Valdemarsgade 53<br>Svendborg<br>5700<br>DENMARK   |
| 208004                                                                                                | Christiansen Merete                    | Sub-Investigator/Co-Investigator | PhD, MD                | Amager Hospital<br>Intern Medicinsk Klinik<br>Italiensvej 1<br>København S<br>2300<br>DENMARK       |
| 208004                                                                                                | Frandsen Hans A.                       | Principal Investigator           | MD                     | Amager Hospital<br>Intern Medicinsk Klinik<br>Italiensvej 1<br>København S<br>2300<br>DENMARK       |
| 208005                                                                                                | Gram Jeppe                             | Principal Investigator           | MD                     | Sydvestjysk Sygehus Esbjerg<br>Endokrinologisk Afd.<br>Finsensgade 35<br>Esbjerg<br>6700<br>DENMARK |

\*CV provided as attachment to this appendix for all principal investigators

*Ensure that the printed copy of this document is the current version available on the Intranet.*

Property of the sanofi-aventis group - strictly confidential

# SUPPLEMENTARY DATA

| LIST OF PRINCIPAL INVESTIGATOR(S) AND SUB-INVESTIGATOR(S) PER STUDY SITE WHERE PATIENTS WERE ENROLLED |                                        |                                               |                        |                                                                                                    |
|-------------------------------------------------------------------------------------------------------|----------------------------------------|-----------------------------------------------|------------------------|----------------------------------------------------------------------------------------------------|
| QSD-002219                                                                                            |                                        |                                               |                        |                                                                                                    |
| Product Code:                                                                                         | AVE0010                                | Study Code:                                   | EFC12703               |                                                                                                    |
| Study Center No.                                                                                      | Investigator last name and first name* | Role in the Investigation                     | Professional Degree(s) | Institutional Affiliation(s)                                                                       |
| 208005                                                                                                | Langdahl Høggild Jacob                 | Sub-Investigator/Co-Investigator RDC Approver | MD                     | Sydvestjysk Sygehus Esbjerg<br>Endokrinologisk Afd.<br>Finsengade 35<br>Esbjerg<br>6700<br>DENMARK |
| 276001                                                                                                | Lammers Dirk                           | Sub-Investigator/Co-Investigator RDC Approver | MD                     | Institut für Diabetesforschung Münster GmbH<br>Hohenzollernring 70<br>Münster<br>48145<br>GERMANY  |
| 276001                                                                                                | Pohlmeier Harald B.                    | Sub-Investigator/Co-Investigator RDC Approver | MD                     | Institut für Diabetesforschung Münster GmbH<br>Hohenzollernring 70<br>Münster<br>48145<br>GERMANY  |
| 276001                                                                                                | Rose Ludger                            | Principal Investigator                        | MD                     | Institut für Diabetesforschung Münster GmbH<br>Hohenzollernring 70<br>Münster<br>48145<br>GERMANY  |
| 276002                                                                                                | Barsnick-Harnest Sabine                | Principal Investigator                        | MD                     | Dr. Barsnick Vital Care UG München<br>Rosa-Bavarese-Straße 1<br>München<br>80639<br>GERMANY        |

\*CV provided as attachment to this appendix for all principal investigators

*Ensure that the printed copy of this document is the current version available on the Intranet.*

Property of the sanofi-aventis group - strictly confidential

# SUPPLEMENTARY DATA

|                                                                                                       |  |  |  |
|-------------------------------------------------------------------------------------------------------|--|--|--|
| LIST OF PRINCIPAL INVESTIGATOR(S) AND SUB-INVESTIGATOR(S) PER STUDY SITE WHERE PATIENTS WERE ENROLLED |  |  |  |
| QSD-002219                                                                                            |  |  |  |

|               |         |             |          |
|---------------|---------|-------------|----------|
| Product Code: | AVE0010 | Study Code: | EFC12703 |
|---------------|---------|-------------|----------|

| Study Center No. | Investigator last name and first name* | Role in the Investigation                     | Professional Degree(s) | Institutional Affiliation(s)                                                                |
|------------------|----------------------------------------|-----------------------------------------------|------------------------|---------------------------------------------------------------------------------------------|
| 276002           | Harnest Ulf                            | Sub-Investigator/Co-Investigator RDC Approver | MD                     | Dr. Barsnick Vital Care UG München<br>Rosa-Bavarese-Straße 1<br>München<br>80639<br>GERMANY |
| 276003           | Alawi Hasan                            | Principal Investigator                        | MD                     | Praxis Dr. Hasan Alawi<br>Brückenstraße 28-30<br>Saarlouis<br>66740<br>GERMANY              |
| 276003           | Warken Bernd                           | Sub-Investigator/Co-Investigator RDC Approver | MD                     | Praxis Dr. Hasan Alawi<br>Brückenstraße 28-30<br>Saarlouis<br>66740<br>GERMANY              |
| 276004           | Plassmann Georg                        | Sub-Investigator/Co-Investigator RDC Approver | MD                     | Unterfrintoper Hausarztzentrum<br>Unterstr. 75<br>Essen<br>45359<br>GERMANY                 |
| 276004           | Weber Dirk                             | Sub-Investigator/Co-Investigator              | MD                     | Unterfrintoper Hausarztzentrum<br>Unterstr. 75<br>Essen<br>45359<br>GERMANY                 |

\*CV provided as attachment to this appendix for all principal investigators

*Ensure that the printed copy of this document is the current version available on the Intranet.*

Property of the sanofi-aventis group - strictly confidential

# SUPPLEMENTARY DATA

| LIST OF PRINCIPAL INVESTIGATOR(S) AND SUB-INVESTIGATOR(S) PER STUDY SITE WHERE PATIENTS WERE ENROLLED |                                        |                                               |                        |                                                                                                                                                                                            |
|-------------------------------------------------------------------------------------------------------|----------------------------------------|-----------------------------------------------|------------------------|--------------------------------------------------------------------------------------------------------------------------------------------------------------------------------------------|
| QSD-002219                                                                                            |                                        |                                               |                        |                                                                                                                                                                                            |
| Product Code:                                                                                         | AVE0010                                | Study Code:                                   | EFC12703               |                                                                                                                                                                                            |
| Study Center No.                                                                                      | Investigator last name and first name* | Role in the Investigation                     | Professional Degree(s) | Institutional Affiliation(s)                                                                                                                                                               |
| 276004                                                                                                | Weber Ulrich                           | Principal Investigator                        | MD                     | Unterfrintoper Hausarztzentrum<br>Unterstr. 75<br>Essen<br>45359<br>GERMANY                                                                                                                |
| 276005                                                                                                | Ganz Xenia                             | Sub-Investigator/Co-Investigator RDC Approver | MD                     | Gesellschaft für Wissens- und Technologietransfer mbH<br>Zentrum für Klinische Studien<br>Forschungsbereich Endokrinologie/Stoffwechsel<br>Fiedlerstraße 34<br>Dresden<br>01307<br>GERMANY |
| 276005                                                                                                | Hanefeld Markolf                       | Principal Investigator                        | MD                     | Gesellschaft für Wissens- und Technologietransfer mbH<br>Zentrum für Klinische Studien<br>Forschungsbereich Endokrinologie/Stoffwechsel<br>Fiedlerstraße 34<br>Dresden<br>01307<br>GERMANY |

\*CV provided as attachment to this appendix for all principal investigators

*Ensure that the printed copy of this document is the current version available on the Intranet.*

Property of the sanofi-aventis group - strictly confidential

# SUPPLEMENTARY DATA

| LIST OF PRINCIPAL INVESTIGATOR(S) AND SUB-INVESTIGATOR(S) PER STUDY SITE WHERE PATIENTS WERE ENROLLED |                                        |                                               |                        |                                                                                                                                                                                            |
|-------------------------------------------------------------------------------------------------------|----------------------------------------|-----------------------------------------------|------------------------|--------------------------------------------------------------------------------------------------------------------------------------------------------------------------------------------|
| QSD-002219                                                                                            |                                        |                                               |                        |                                                                                                                                                                                            |
| Product Code:                                                                                         | AVE0010                                | Study Code:                                   | EFC12703               |                                                                                                                                                                                            |
| Study Center No.                                                                                      | Investigator last name and first name* | Role in the Investigation                     | Professional Degree(s) | Institutional Affiliation(s)                                                                                                                                                               |
| 276005                                                                                                | Henkel Elena                           | Sub-Investigator/Co-Investigator RDC Approver | MD                     | Gesellschaft für Wissens- und Technologietransfer mbH<br>Zentrum für Klinische Studien<br>Forschungsbereich Endokrinologie/Stoffwechsel<br>Fiedlerstraße 34<br>Dresden<br>01307<br>GERMANY |
| 276005                                                                                                | John Franziska                         | Sub-Investigator/Co-Investigator RDC Approver | MD                     | Gesellschaft für Wissens- und Technologietransfer mbH<br>Zentrum für Klinische Studien<br>Forschungsbereich Endokrinologie/Stoffwechsel<br>Fiedlerstraße 34<br>Dresden<br>01307<br>GERMANY |
| 276005                                                                                                | Muessig Ilona                          | Sub-Investigator/Co-Investigator              | MD                     | Gesellschaft für Wissens- und Technologietransfer mbH<br>Zentrum für Klinische Studien<br>Forschungsbereich Endokrinologie/Stoffwechsel<br>Fiedlerstraße 34<br>Dresden<br>01307<br>GERMANY |

\*CV provided as attachment to this appendix for all principal investigators

*Ensure that the printed copy of this document is the current version available on the Intranet.*

Property of the sanofi-aventis group - strictly confidential

# SUPPLEMENTARY DATA

| LIST OF PRINCIPAL INVESTIGATOR(S) AND SUB-INVESTIGATOR(S) PER STUDY SITE WHERE PATIENTS WERE ENROLLED |                                        |                                               |                        |                                                                                                                                                                                            |
|-------------------------------------------------------------------------------------------------------|----------------------------------------|-----------------------------------------------|------------------------|--------------------------------------------------------------------------------------------------------------------------------------------------------------------------------------------|
| QSD-002219                                                                                            |                                        |                                               |                        |                                                                                                                                                                                            |
| Product Code:                                                                                         | AVE0010                                | Study Code:                                   | EFC12703               |                                                                                                                                                                                            |
| Study Center No.                                                                                      | Investigator last name and first name* | Role in the Investigation                     | Professional Degree(s) | Institutional Affiliation(s)                                                                                                                                                               |
| 276005                                                                                                | Pistrosch Frank                        | Sub-Investigator/Co-Investigator              | MD                     | Gesellschaft für Wissens- und Technologietransfer mbH<br>Zentrum für Klinische Studien<br>Forschungsbereich Endokrinologie/Stoffwechsel<br>Fiedlerstraße 34<br>Dresden<br>01307<br>GERMANY |
| 276005                                                                                                | Pohl Wilgard                           | Sub-Investigator/Co-Investigator              | MD                     | Gesellschaft für Wissens- und Technologietransfer mbH<br>Zentrum für Klinische Studien<br>Forschungsbereich Endokrinologie/Stoffwechsel<br>Fiedlerstraße 34<br>Dresden<br>01307<br>GERMANY |
| 276006                                                                                                | <a href="#">Kosch Christine</a>        | Principal Investigator                        | MD                     | Praxis Christine Kosch<br>Königsteiner Straße 6B<br>Pirna<br>01796<br>GERMANY                                                                                                              |
| 276006                                                                                                | Prochazkova Zdenka                     | Sub-Investigator/Co-Investigator RDC Approver | MD                     | Praxis Christine Kosch<br>Königsteiner Straße 6B<br>Pirna<br>01796<br>GERMANY                                                                                                              |

\*CV provided as attachment to this appendix for all principal investigators

*Ensure that the printed copy of this document is the current version available on the Intranet.*

Property of the sanofi-aventis group - strictly confidential

# SUPPLEMENTARY DATA

| LIST OF PRINCIPAL INVESTIGATOR(S) AND SUB-INVESTIGATOR(S) PER STUDY SITE WHERE PATIENTS WERE ENROLLED |                                        |                                               |                        |                                                                                                                                                                      |
|-------------------------------------------------------------------------------------------------------|----------------------------------------|-----------------------------------------------|------------------------|----------------------------------------------------------------------------------------------------------------------------------------------------------------------|
| QSD-002219                                                                                            |                                        |                                               |                        |                                                                                                                                                                      |
| Product Code:                                                                                         | AVE0010                                | Study Code:                                   | EFC12703               |                                                                                                                                                                      |
| Study Center No.                                                                                      | Investigator last name and first name* | Role in the Investigation                     | Professional Degree(s) | Institutional Affiliation(s)                                                                                                                                         |
| 276007                                                                                                | Marck Cornelia                         | Principal Investigator                        | MD                     | GP Dr. Marck/Marck/Dr. Linn/Pickel Pohlheim<br>Dr. Cornelia Marck/Gerd-Peter Marck/Dr. Elisabeth Linn/Marcus Pickel<br>Neue Mitte 10<br>Pohlheim<br>35415<br>GERMANY |
| 276007                                                                                                | Pickel Marcus                          | Sub-Investigator/Co-Investigator RDC Approver | MD                     | GP Dr. Marck/Marck/Dr. Linn/Pickel Pohlheim<br>Dr. Cornelia Marck/Gerd-Peter Marck/Dr. Elisabeth Linn/Marcus Pickel<br>Neue Mitte 10<br>Pohlheim<br>35415<br>GERMANY |
| 276008                                                                                                | Funke Klaus                            | Principal Investigator                        | MD                     | IkFE Studiencenter Potsdam GmbH<br>Friedrich-Klausing-Straße 5<br>Potsdam<br>14469<br>GERMANY                                                                        |
| 276008                                                                                                | Oeter Christine                        | Sub-Investigator/Co-Investigator RDC Approver | MD                     | IkFE Studiencenter Potsdam GmbH<br>Friedrich-Klausing-Straße 5<br>Potsdam<br>14469<br>GERMANY                                                                        |

\*CV provided as attachment to this appendix for all principal investigators

*Ensure that the printed copy of this document is the current version available on the Intranet.*

Property of the sanofi-aventis group - strictly confidential



# SUPPLEMENTARY DATA

| LIST OF PRINCIPAL INVESTIGATOR(S) AND SUB-INVESTIGATOR(S) PER STUDY SITE WHERE PATIENTS WERE ENROLLED |                                        |                                  |                        |                                                                                                              |
|-------------------------------------------------------------------------------------------------------|----------------------------------------|----------------------------------|------------------------|--------------------------------------------------------------------------------------------------------------|
| QSD-002219                                                                                            |                                        |                                  |                        |                                                                                                              |
| Product Code:                                                                                         | AVE0010                                | Study Code:                      | EFC12703               |                                                                                                              |
| Study Center No.                                                                                      | Investigator last name and first name* | Role in the Investigation        | Professional Degree(s) | Institutional Affiliation(s)                                                                                 |
| 578001                                                                                                | Gronert Jorn O.                        | Principal Investigator           | MD                     | Flattum Legesenter, Høngata 70A<br>Høngata 70A<br>Postboks 1175, 3503 Hønefoss<br>Hønefoss<br>3515<br>NORWAY |
| 578003                                                                                                | Langslet Gisle                         | Principal Investigator           | MD                     | Oslo Universitetssykehus HF<br>Rikshospitalet, Lipiklinikken<br>0372 Oslo<br>NORWAY                          |
| 578003                                                                                                | Seferowicz Maria                       | Sub-Investigator/Co-Investigator | MD                     | Oslo Universitetssykehus HF<br>Rikshospitalet, Lipiklinikken<br>0372 Oslo<br>NORWAY                          |
| 578003                                                                                                | Srikumar Nirosha                       | Sub-Investigator/Co-Investigator | MD                     | Oslo Universitetssykehus HF<br>Rikshospitalet, Lipiklinikken<br>0372 Oslo<br>NORWAY                          |
| 578004                                                                                                | Sordal Terje                           | Principal Investigator           | MD                     | Medicus<br>Senter For Kliniske Studier Trondheim<br>Sverresgate 15 E<br>Trondheim<br>7012<br>NORWAY          |

\*CV provided as attachment to this appendix for all principal investigators

*Ensure that the printed copy of this document is the current version available on the Intranet.*

Property of the sanofi-aventis group - strictly confidential

# SUPPLEMENTARY DATA

| LIST OF PRINCIPAL INVESTIGATOR(S) AND SUB-INVESTIGATOR(S) PER STUDY SITE WHERE PATIENTS WERE ENROLLED |                                        |                                               |                        |                                                                                                      |
|-------------------------------------------------------------------------------------------------------|----------------------------------------|-----------------------------------------------|------------------------|------------------------------------------------------------------------------------------------------|
| QSD-002219                                                                                            |                                        |                                               |                        |                                                                                                      |
| Product Code:                                                                                         | AVE0010                                | Study Code:                                   | EFC12703               |                                                                                                      |
| Study Center No.                                                                                      | Investigator last name and first name* | Role in the Investigation                     | Professional Degree(s) | Institutional Affiliation(s)                                                                         |
| 578004                                                                                                | Sordal Oystein                         | Sub-Investigator/Co-Investigator              | MD                     | Medicus<br>Senter For Kliniske Studier Trondheim<br>Sverresgate 15 E<br>Trondheim<br>7012<br>NORWAY  |
| 578005                                                                                                | Reimer Sten                            | Principal Investigator                        | MD                     | Parkvegen Legekontor<br>Winsnes gate 62<br>Kongsvinger<br>2212<br>NORWAY                             |
| 578006                                                                                                | Cooper John                            | Principal Investigator                        | MD                     | Stavanger Helseforskning AS<br>Jan Johnsens gate 5<br>4068 Stavanger<br>NORWAY                       |
| 604001                                                                                                | Delgado Butron Cesar M.                | Principal Investigator                        | MD                     | Centro Endocrinológico DELGADO<br>Calle Daniel Alcides Carrion 126 IV Centenario<br>Arequipa<br>PERU |
| 604001                                                                                                | Delgado Torres Leonidas D.             | Sub-Investigator/Co-Investigator RDC Approver | MD                     | Centro Endocrinológico DELGADO<br>Calle Daniel Alcides Carrion 126 IV Centenario<br>Arequipa<br>PERU |
| 604001                                                                                                | Delgado Torres Cesar M.                | Sub-Investigator/Co-Investigator RDC Approver | MD                     | Centro Endocrinológico DELGADO<br>Calle Daniel Alcides Carrion 126 IV Centenario<br>Arequipa<br>PERU |

\*CV provided as attachment to this appendix for all principal investigators

Ensure that the printed copy of this document is the current version available on the Intranet.

Property of the sanofi-aventis group - strictly confidential

# SUPPLEMENTARY DATA

| LIST OF PRINCIPAL INVESTIGATOR(S) AND SUB-INVESTIGATOR(S) PER STUDY SITE WHERE PATIENTS WERE ENROLLED |                                            |                                  |                        |                                                                                                                                      |
|-------------------------------------------------------------------------------------------------------|--------------------------------------------|----------------------------------|------------------------|--------------------------------------------------------------------------------------------------------------------------------------|
| QSD-002219                                                                                            |                                            |                                  |                        |                                                                                                                                      |
| Product Code:                                                                                         | AVE0010                                    | Study Code:                      | EFC12703               |                                                                                                                                      |
| Study Center No.                                                                                      | Investigator last name and first name*     | Role in the Investigation        | Professional Degree(s) | Institutional Affiliation(s)                                                                                                         |
| 604002                                                                                                | Arellano Salazar Martha P.                 | Sub-Investigator/Co-Investigator | MD                     | ENDOMED del Centro Médico Clínica San Judas Tadeo<br>Laureano Martínez 140 – Tercer Piso Oficina 21<br>San Miguel<br>Lima 32<br>PERU |
| 604002                                                                                                | <a href="#">Dextre Espinoza Augusto A.</a> | Principal Investigator           | MD                     | ENDOMED del Centro Médico Clínica San Judas Tadeo<br>Laureano Martínez 140 – Tercer Piso Oficina 21<br>San Miguel<br>Lima 32<br>PERU |
| 604002                                                                                                | Kundert Abuid Karim S.                     | Sub-Investigator/Co-Investigator | MD                     | ENDOMED del Centro Médico Clínica San Judas Tadeo<br>Laureano Martínez 140 – Tercer Piso Oficina 21<br>San Miguel<br>Lima 32<br>PERU |
| 604002                                                                                                | Davila Uriarte Carmen A.                   | Sub-Investigator/Co-Investigator | MD                     | ENDOMED del Centro Médico Clínica San Judas Tadeo<br>Laureano Martínez 140 – Tercer Piso Oficina 21<br>San Miguel<br>Lima 32<br>PERU |

\*CV provided as attachment to this appendix for all principal investigators

*Ensure that the printed copy of this document is the current version available on the Intranet.*

Property of the sanofi-aventis group - strictly confidential

# SUPPLEMENTARY DATA

| LIST OF PRINCIPAL INVESTIGATOR(S) AND SUB-INVESTIGATOR(S) PER STUDY SITE WHERE PATIENTS WERE ENROLLED |                                        |                                             |                        |                                                                                                                            |
|-------------------------------------------------------------------------------------------------------|----------------------------------------|---------------------------------------------|------------------------|----------------------------------------------------------------------------------------------------------------------------|
| QSD-002219                                                                                            |                                        |                                             |                        |                                                                                                                            |
| Product Code:                                                                                         | AVE0010                                | Study Code:                                 | EFC12703               |                                                                                                                            |
| Study Center No.                                                                                      | Investigator last name and first name* | Role in the Investigation                   | Professional Degree(s) | Institutional Affiliation(s)                                                                                               |
| 604003                                                                                                | Acosta Chacaltana Max C.               | Sub-Investigator/Co-Investigator            | MD                     | Centro De Investigacion En Diabetes, Obesidad Y Nutrición<br>Calle Alberto Alexander 2480 Lince<br>Lima<br>LIMA 14<br>PERU |
| 604003                                                                                                | Aro Guardia Pedro A.                   | Sub-Investigator/Co-Investigator            | MD                     | Centro De Investigacion En Diabetes, Obesidad Y Nutrición<br>Calle Alberto Alexander 2480 Lince<br>Lima<br>LIMA 14<br>PERU |
| 604003                                                                                                | Calipuy Galvez Juan M.                 | Sub-Investigator/Co-Investigator RDC Writer | MD                     | Centro De Investigacion En Diabetes, Obesidad Y Nutrición<br>Calle Alberto Alexander 2480 Lince<br>Lima<br>LIMA 14<br>PERU |
| 604003                                                                                                | Manrique Hurtado Helard A.             | Principal Investigator                      | MD                     | Centro De Investigacion En Diabetes, Obesidad Y Nutrición<br>Calle Alberto Alexander 2480 Lince<br>Lima<br>LIMA 14<br>PERU |

\*CV provided as attachment to this appendix for all principal investigators

*Ensure that the printed copy of this document is the current version available on the Intranet.*

Property of the sanofi-aventis group - strictly confidential

# SUPPLEMENTARY DATA

| LIST OF PRINCIPAL INVESTIGATOR(S) AND SUB-INVESTIGATOR(S) PER STUDY SITE WHERE PATIENTS WERE ENROLLED |                                        |                                               |                        |                                                                                                                            |
|-------------------------------------------------------------------------------------------------------|----------------------------------------|-----------------------------------------------|------------------------|----------------------------------------------------------------------------------------------------------------------------|
| QSD-002219                                                                                            |                                        |                                               |                        |                                                                                                                            |
| Product Code:                                                                                         | AVE0010                                | Study Code:                                   | EFC12703               |                                                                                                                            |
| Study Center No.                                                                                      | Investigator last name and first name* | Role in the Investigation                     | Professional Degree(s) | Institutional Affiliation(s)                                                                                               |
| 604003                                                                                                | Núñez Calderón Cecilia C.              | Sub-Investigator/Co-Investigator              | MD                     | Centro De Investigacion En Diabetes, Obesidad Y Nutrición<br>Calle Alberto Alexander 2480 Lince<br>Lima<br>LIMA 14<br>PERU |
| 604003                                                                                                | Quiroz Lozada Carlos M.                | Sub-Investigator/Co-Investigator RDC Approver | MD                     | Centro De Investigacion En Diabetes, Obesidad Y Nutrición<br>Calle Alberto Alexander 2480 Lince<br>Lima<br>LIMA 14<br>PERU |
| 604003                                                                                                | Zapana Mansilla Alexander A.           | Sub-Investigator/Co-Investigator RDC Approver | MD                     | Centro De Investigacion En Diabetes, Obesidad Y Nutrición<br>Calle Alberto Alexander 2480 Lince<br>Lima<br>LIMA 14<br>PERU |
| 604003                                                                                                | Núñez Cecilia                          | Sub-Investigator/Co-Investigator              | MD                     | Centro De Investigacion En Diabetes, Obesidad Y Nutrición<br>Calle Alberto Alexander 2480 Lince<br>Lima<br>LIMA 14<br>PERU |

\*CV provided as attachment to this appendix for all principal investigators

*Ensure that the printed copy of this document is the current version available on the Intranet.*

Property of the sanofi-aventis group - strictly confidential

# SUPPLEMENTARY DATA

| LIST OF PRINCIPAL INVESTIGATOR(S) AND SUB-INVESTIGATOR(S) PER STUDY SITE WHERE PATIENTS WERE ENROLLED |                                        |                                             |                        |                                                                                                       |
|-------------------------------------------------------------------------------------------------------|----------------------------------------|---------------------------------------------|------------------------|-------------------------------------------------------------------------------------------------------|
| QSD-002219                                                                                            |                                        |                                             |                        |                                                                                                       |
| Product Code:                                                                                         | AVE0010                                | Study Code:                                 | EFC12703               |                                                                                                       |
| Study Center No.                                                                                      | Investigator last name and first name* | Role in the Investigation                   | Professional Degree(s) | Institutional Affiliation(s)                                                                          |
| 604005                                                                                                | More Verde Claudia                     | Sub-Investigator/Co-Investigator RDC Writer | MD                     | Clinica El Golf<br>Av. Aurelio Miro Quezada 1050 Oficina 203<br>San Isidro<br>Lima<br>LIMA 10<br>PERU |
| 604005                                                                                                | More Saldaña Luis A.                   | Principal Investigator                      | MD                     | Clinica El Golf<br>Av. Aurelio Miro Quezada 1050 Oficina 203<br>San Isidro<br>Lima<br>LIMA 10<br>PERU |
| 604005                                                                                                | Narvaez Ernesto H.                     | Sub-Investigator/Co-Investigator RDC Writer | MD                     | Clinica El Golf<br>Av. Aurelio Miro Quezada 1050 Oficina 203<br>San Isidro<br>Lima<br>LIMA 10<br>PERU |
| 604006                                                                                                | Noriega Ruiz Victor H.                 | Sub-Investigator/Co-Investigator RDC Writer | MD                     | Hospital Nacional Cayetano Heredia<br>Av. Honorio Delgado 262<br>Lima<br>LIMA 31<br>PERU              |

\*CV provided as attachment to this appendix for all principal investigators

*Ensure that the printed copy of this document is the current version available on the Intranet.*

Property of the sanofi-aventis group - strictly confidential

# SUPPLEMENTARY DATA

| LIST OF PRINCIPAL INVESTIGATOR(S) AND SUB-INVESTIGATOR(S) PER STUDY SITE WHERE PATIENTS WERE ENROLLED |                                        |                                  |                        |                                                                                               |
|-------------------------------------------------------------------------------------------------------|----------------------------------------|----------------------------------|------------------------|-----------------------------------------------------------------------------------------------|
| QSD-002219                                                                                            |                                        |                                  |                        |                                                                                               |
| Product Code:                                                                                         | AVE0010                                | Study Code:                      | EFC12703               |                                                                                               |
| Study Center No.                                                                                      | Investigator last name and first name* | Role in the Investigation        | Professional Degree(s) | Institutional Affiliation(s)                                                                  |
| 604006                                                                                                | Pinto Valdivia Miguel E.               | Principal Investigator           | MD                     | Hospital Nacional Cayetano Heredia<br>Av. Honorio Delgado 262<br>Lima<br>LIMA 31<br>PERU      |
| 604006                                                                                                | Ramirez-Vela Rosa M.                   | Sub-Investigator/Co-Investigator | MD                     | Hospital Nacional Cayetano Heredia<br>Av. Honorio Delgado 262<br>Lima<br>LIMA 31<br>PERU      |
| 604007                                                                                                | Valdivia Portugal Angelica M.          | Principal Investigator           | MD                     | Clinica Geriatrica del Ejército<br>Avenida Escuela Militar s/n, Chorrillos<br>Lima 09<br>PERU |
| 604007                                                                                                | Sotomayor Carranza Ivette G.           | Sub-Investigator/Co-Investigator | MD                     | Clinica Geriatrica del Ejército<br>Avenida Escuela Militar s/n, Chorrillos<br>Lima 09<br>PERU |
| 604007                                                                                                | Campos Cardenas Lourdes V.             | Sub-Investigator/Co-Investigator | MD                     | Clinica Geriatrica del Ejército<br>Avenida Escuela Militar s/n, Chorrillos<br>Lima 09<br>PERU |
| 604008                                                                                                | Bardales Ruiz Dario                    | Sub-Investigator/Co-Investigator | MD                     | Clinica Virgen Maria Auxiliadora<br>Calle Pedro de León 200, Urb Clarke<br>Piura<br>PERU      |

\*CV provided as attachment to this appendix for all principal investigators

*Ensure that the printed copy of this document is the current version available on the Intranet.*

Property of the sanofi-aventis group - strictly confidential

# SUPPLEMENTARY DATA

| LIST OF PRINCIPAL INVESTIGATOR(S) AND SUB-INVESTIGATOR(S) PER STUDY SITE WHERE PATIENTS WERE ENROLLED |                                        |                                               |                        |                                                                                                                 |
|-------------------------------------------------------------------------------------------------------|----------------------------------------|-----------------------------------------------|------------------------|-----------------------------------------------------------------------------------------------------------------|
| QSD-002219                                                                                            |                                        |                                               |                        |                                                                                                                 |
| Product Code:                                                                                         | AVE0010                                | Study Code:                                   | EFC12703               |                                                                                                                 |
| Study Center No.                                                                                      | Investigator last name and first name* | Role in the Investigation                     | Professional Degree(s) | Institutional Affiliation(s)                                                                                    |
| 604008                                                                                                | Mio Palacios Edwin A.                  | Sub-Investigator/Co-Investigator              | MD                     | Clinica Virgen Maria Auxiliadora<br>Calle Pedro de León 200, Urb Clarke<br>Piura<br>PERU                        |
| 604008                                                                                                | Saldarriaga Taboada Guillermo          | Sub-Investigator/Co-Investigator RDC Approver | MD                     | Clinica Virgen Maria Auxiliadora<br>Calle Pedro de León 200, Urb Clarke<br>Piura<br>PERU                        |
| 604008                                                                                                | Vargas Gonzales Rolando J.             | Principal Investigator                        | MD                     | Clinica Virgen Maria Auxiliadora<br>Calle Pedro de León 200, Urb Clarke<br>Piura<br>PERU                        |
| 604011                                                                                                | Calderon Ticona Jorge R.               | Principal Investigator                        | MD                     | Novocardio Centro de Investigacion y atencion cardiovascular<br>Av Salaverry 2665 San Isidro<br>Lima<br>27 PERU |
| 604011                                                                                                | Garcia Ramos Freddy E.                 | Sub-Investigator/Co-Investigator              | MD                     | Novocardio Centro de Investigacion y atencion cardiovascular<br>Av Salaverry 2665 San Isidro<br>Lima<br>27 PERU |
| 604011                                                                                                | Núñez Torres Pedro                     | Sub-Investigator/Co-Investigator              | MD                     | Novocardio Centro de Investigacion y atencion cardiovascular<br>Av Salaverry 2665 San Isidro<br>Lima<br>27 PERU |

\*CV provided as attachment to this appendix for all principal investigators

*Ensure that the printed copy of this document is the current version available on the Intranet.*

Property of the sanofi-aventis group - strictly confidential



# SUPPLEMENTARY DATA

|                                                                                                       |  |  |  |
|-------------------------------------------------------------------------------------------------------|--|--|--|
| LIST OF PRINCIPAL INVESTIGATOR(S) AND SUB-INVESTIGATOR(S) PER STUDY SITE WHERE PATIENTS WERE ENROLLED |  |  |  |
| QSD-002219                                                                                            |  |  |  |

|               |         |             |          |
|---------------|---------|-------------|----------|
| Product Code: | AVE0010 | Study Code: | EFC12703 |
|---------------|---------|-------------|----------|

| Study Center No. | Investigator last name and first name* | Role in the Investigation        | Professional Degree(s) | Institutional Affiliation(s)                                                                                    |
|------------------|----------------------------------------|----------------------------------|------------------------|-----------------------------------------------------------------------------------------------------------------|
| 604011           | Pimentel Fernandez Carolina L.         | Sub-Investigator/Co-Investigator | MD                     | Novocardio Centro de Investigacion y atencion cardiovascular<br>Av Salaverry 2665 San Isidro<br>Lima<br>27 PERU |
| 604011           | Hirano Espejo S.                       | Sub-Investigator/Co-Investigator | MD                     | Novocardio Centro de Investigacion y atencion cardiovascular<br>Av Salaverry 2665 San Isidro<br>Lima<br>27 PERU |
| 604011           | Ruiz Velazco Maria B.                  | Sub-Investigator/Co-Investigator | MD                     | Novocardio Centro de Investigacion y atencion cardiovascular<br>Av Salaverry 2665 San Isidro<br>Lima<br>27 PERU |
| 604011           | Marcelino Longa Lopez John C.          | Sub-Investigator/Co-Investigator | MD                     | Novocardio Centro de Investigacion y atencion cardiovascular<br>Av Salaverry 2665 San Isidro<br>Lima<br>27 PERU |
| 604011           | Almendras Villon Juan M.               | Sub-Investigator/Co-Investigator | MD                     | Novocardio Centro de Investigacion y atencion cardiovascular<br>Av Salaverry 2665 San Isidro<br>Lima<br>27 PERU |

\*CV provided as attachment to this appendix for all principal investigators

*Ensure that the printed copy of this document is the current version available on the Intranet.*

Property of the sanofi-aventis group - strictly confidential

# SUPPLEMENTARY DATA

| LIST OF PRINCIPAL INVESTIGATOR(S) AND SUB-INVESTIGATOR(S) PER STUDY SITE WHERE PATIENTS WERE ENROLLED |                                        |                                               |                        |                                                                                                                |
|-------------------------------------------------------------------------------------------------------|----------------------------------------|-----------------------------------------------|------------------------|----------------------------------------------------------------------------------------------------------------|
| QSD-002219                                                                                            |                                        |                                               |                        |                                                                                                                |
| Product Code:                                                                                         | AVE0010                                | Study Code:                                   | EFC12703               |                                                                                                                |
| Study Center No.                                                                                      | Investigator last name and first name* | Role in the Investigation                     | Professional Degree(s) | Institutional Affiliation(s)                                                                                   |
| 616001                                                                                                | Krzyzagorska Ewa P.L.                  | Principal Investigator                        | MD, PhD                | Praktyka Lekarska Ewa Krzyzagorska<br>Murawa 37A<br>Poznan<br>61-665<br>Wielkopolskie<br>POLAND                |
| 616001                                                                                                | Sekulska Marzenna                      | Sub-Investigator/Co-Investigator RDC Approver | MD                     | Praktyka Lekarska Ewa Krzyzagorska<br>Murawa 37A<br>Poznan<br>61-665<br>Wielkopolskie<br>POLAND                |
| 616002                                                                                                | Heince Ewa                             | Sub-Investigator/Co-Investigator RDC Approver | MD                     | Przychodnia Specjalistyczna Wittek, Rudzki<br>ul. Niedurnego 50D<br>Ruda Slaska<br>41-709<br>Slaskie<br>POLAND |
| 616002                                                                                                | Rudzka Jadwiga                         | Sub-Investigator/Co-Investigator RDC Approver | MD                     | Przychodnia Specjalistyczna Wittek, Rudzki<br>ul. Niedurnego 50D<br>Ruda Slaska<br>41-709<br>Slaskie<br>POLAND |

\*CV provided as attachment to this appendix for all principal investigators

*Ensure that the printed copy of this document is the current version available on the Intranet.*

Property of the sanofi-aventis group - strictly confidential

# SUPPLEMENTARY DATA

| LIST OF PRINCIPAL INVESTIGATOR(S) AND SUB-INVESTIGATOR(S) PER STUDY SITE WHERE PATIENTS WERE ENROLLED |                                        |                                               |                        |                                                                                                                    |
|-------------------------------------------------------------------------------------------------------|----------------------------------------|-----------------------------------------------|------------------------|--------------------------------------------------------------------------------------------------------------------|
| QSD-002219                                                                                            |                                        |                                               |                        |                                                                                                                    |
| Product Code:                                                                                         | AVE0010                                | Study Code:                                   | EFC12703               |                                                                                                                    |
| Study Center No.                                                                                      | Investigator last name and first name* | Role in the Investigation                     | Professional Degree(s) | Institutional Affiliation(s)                                                                                       |
| 616002                                                                                                | Rudzki Henryk                          | Principal Investigator                        | MD                     | Przychodnia Specjalistyczna Wittek, Rudzki<br>ul. Niedurnego 50D<br>Ruda Slaska<br>41-709<br>Slaskie<br>POLAND     |
| 616002                                                                                                | Wittek Andrzej                         | Sub-Investigator/Co-Investigator RDC Approver | MD                     | Przychodnia Specjalistyczna Wittek, Rudzki<br>ul. Niedurnego 50D<br>Ruda Slaska<br>41-709<br>Slaskie<br>POLAND     |
| 616003                                                                                                | Kowalski Robert                        | Sub-Investigator/Co-Investigator RDC Approver | MD                     | Grazyna Pulka Specjalistyczny Ośrodek "All-Med"<br>ul. Sw. Marka 31/1<br>Krakow<br>31-024<br>Malopolskie<br>POLAND |
| 616003                                                                                                | Moroz Ewa                              | Sub-Investigator/Co-Investigator RDC Approver | MD                     | Grazyna Pulka Specjalistyczny Ośrodek "All-Med"<br>ul. Sw. Marka 31/1<br>Krakow<br>31-024<br>Malopolskie<br>POLAND |

\*CV provided as attachment to this appendix for all principal investigators

*Ensure that the printed copy of this document is the current version available on the Intranet.*

Property of the sanofi-aventis group - strictly confidential

# SUPPLEMENTARY DATA

| LIST OF PRINCIPAL INVESTIGATOR(S) AND SUB-INVESTIGATOR(S) PER STUDY SITE WHERE PATIENTS WERE ENROLLED |                                        |                                               |                        |                                                                                                                    |
|-------------------------------------------------------------------------------------------------------|----------------------------------------|-----------------------------------------------|------------------------|--------------------------------------------------------------------------------------------------------------------|
| QSD-002219                                                                                            |                                        |                                               |                        |                                                                                                                    |
| Product Code:                                                                                         | AVE0010                                | Study Code:                                   | EFC12703               |                                                                                                                    |
| Study Center No.                                                                                      | Investigator last name and first name* | Role in the Investigation                     | Professional Degree(s) | Institutional Affiliation(s)                                                                                       |
| 616003                                                                                                | Pulka Grazyna                          | Principal Investigator                        | MD, PhD                | Grazyna Pulka Specjalistyczny Ośrodek "All-Med"<br>ul. Sw. Marka 31/1<br>Krakow<br>31-024<br>Malopolskie<br>POLAND |
| 616003                                                                                                | Pulka Magdalena                        | Sub-Investigator/Co-Investigator RDC Approver | MD                     | Grazyna Pulka Specjalistyczny Ośrodek "All-Med"<br>ul. Sw. Marka 31/1<br>Krakow<br>31-024<br>Malopolskie<br>POLAND |
| 616004                                                                                                | Babol Irena                            | Principal Investigator                        | MD                     | NZOZ Gdanska Poradnia Cukrzycowa<br>Ul. Walowa 27<br>Gdansk<br>80-858<br>Pomorskie<br>POLAND                       |
| 616004                                                                                                | Romanczuk Piotr                        | Sub-Investigator/Co-Investigator RDC Approver | MD                     | NZOZ Gdanska Poradnia Cukrzycowa<br>Ul. Walowa 27<br>Gdansk<br>80-858<br>Pomorskie<br>POLAND                       |

\*CV provided as attachment to this appendix for all principal investigators

*Ensure that the printed copy of this document is the current version available on the Intranet.*

Property of the sanofi-aventis group - strictly confidential

# SUPPLEMENTARY DATA

| LIST OF PRINCIPAL INVESTIGATOR(S) AND SUB-INVESTIGATOR(S) PER STUDY SITE WHERE PATIENTS WERE ENROLLED |                                        |                                               |                        |                                                                                                                                              |
|-------------------------------------------------------------------------------------------------------|----------------------------------------|-----------------------------------------------|------------------------|----------------------------------------------------------------------------------------------------------------------------------------------|
| QSD-002219                                                                                            |                                        |                                               |                        |                                                                                                                                              |
| Product Code:                                                                                         | AVE0010                                | Study Code:                                   | EFC12703               |                                                                                                                                              |
| Study Center No.                                                                                      | Investigator last name and first name* | Role in the Investigation                     | Professional Degree(s) | Institutional Affiliation(s)                                                                                                                 |
| 616006                                                                                                | Gromniak Elwira                        | Principal Investigator                        | MD, PhD                | Indywidualna Specjalistyczna Praktyka Lekarska<br>E.Gromniak<br>ul. T. Starzyńskiego 2<br>Szczecin<br>70-506<br>Zachodniopomorskie<br>POLAND |
| 616006                                                                                                | Holda Ewa                              | Sub-Investigator/Co-Investigator RDC Approver | MD                     | Indywidualna Specjalistyczna Praktyka Lekarska<br>E.Gromniak<br>ul. T. Starzyńskiego 2<br>Szczecin<br>70-506<br>Zachodniopomorskie<br>POLAND |
| 616006                                                                                                | Wolny Malgorzata                       | Sub-Investigator/Co-Investigator RDC Approver | MD                     | Indywidualna Specjalistyczna Praktyka Lekarska<br>E.Gromniak<br>ul. T. Starzyńskiego 2<br>Szczecin<br>70-506<br>Zachodniopomorskie<br>POLAND |

\*CV provided as attachment to this appendix for all principal investigators

*Ensure that the printed copy of this document is the current version available on the Intranet.*

Property of the sanofi-aventis group - strictly confidential

# SUPPLEMENTARY DATA

|                                                                                                       |  |  |  |
|-------------------------------------------------------------------------------------------------------|--|--|--|
| LIST OF PRINCIPAL INVESTIGATOR(S) AND SUB-INVESTIGATOR(S) PER STUDY SITE WHERE PATIENTS WERE ENROLLED |  |  |  |
| QSD-002219                                                                                            |  |  |  |

|               |         |             |          |
|---------------|---------|-------------|----------|
| Product Code: | AVE0010 | Study Code: | EFC12703 |
|---------------|---------|-------------|----------|

| Study Center No. | Investigator last name and first name* | Role in the Investigation                     | Professional Degree(s) | Institutional Affiliation(s)                                                                                              |
|------------------|----------------------------------------|-----------------------------------------------|------------------------|---------------------------------------------------------------------------------------------------------------------------|
| 710002           | Basson De Vries M.                     | Sub-Investigator/Co-Investigator RDC Approver | MD                     | Karl Bremer Hospital<br>Tiervlei Trial Centre<br>Mike Pienaar Boulewaard<br>Belville<br>Cape Town<br>7530<br>SOUTH AFRICA |
| 710002           | Nel Jeanne                             | Sub-Investigator/Co-Investigator RDC Approver | MD                     | Karl Bremer Hospital<br>Tiervlei Trial Centre<br>Mike Pienaar Boulewaard<br>Belville<br>Cape Town<br>7530<br>SOUTH AFRICA |
| 710002           | Nell Haylene                           | Sub-Investigator/Co-Investigator RDC Approver | MD                     | Karl Bremer Hospital<br>Tiervlei Trial Centre<br>Mike Pienaar Boulewaard<br>Belville<br>Cape Town<br>7530<br>SOUTH AFRICA |

\*CV provided as attachment to this appendix for all principal investigators

*Ensure that the printed copy of this document is the current version available on the Intranet.*

Property of the sanofi-aventis group - strictly confidential

# SUPPLEMENTARY DATA

| LIST OF PRINCIPAL INVESTIGATOR(S) AND SUB-INVESTIGATOR(S) PER STUDY SITE WHERE PATIENTS WERE ENROLLED |                                        |                                               |                        |                                                                                                                                                      |
|-------------------------------------------------------------------------------------------------------|----------------------------------------|-----------------------------------------------|------------------------|------------------------------------------------------------------------------------------------------------------------------------------------------|
| QSD-002219                                                                                            |                                        |                                               |                        |                                                                                                                                                      |
| Product Code:                                                                                         | AVE0010                                | Study Code:                                   | EFC12703               |                                                                                                                                                      |
| Study Center No.                                                                                      | Investigator last name and first name* | Role in the Investigation                     | Professional Degree(s) | Institutional Affiliation(s)                                                                                                                         |
| 710002                                                                                                | Pretorius Maria                        | Sub-Investigator/Co-Investigator RDC Approver | MD                     | Karl Bremer Hospital<br>Tiervlei Trial Centre<br>Mike Pienaar Boulevaard<br>Belville<br>Cape Town<br>7530<br>SOUTH AFRICA                            |
| 710002                                                                                                | Siebert Mirna C.                       | Principal Investigator                        | MD                     | Karl Bremer Hospital<br>Tiervlei Trial Centre<br>Mike Pienaar Boulevaard<br>Belville<br>Cape Town<br>7530<br>SOUTH AFRICA                            |
| 710003                                                                                                | Blignaut Sue C.                        | Sub-Investigator/Co-Investigator RDC Approver | MD                     | TREAD Research - Cardiology Unit<br>Room 41, 8th Floor<br>Tygerburg Hospital<br>Francie van Zijl Drive<br>Parow<br>Cape Town<br>7500<br>SOUTH AFRICA |

\*CV provided as attachment to this appendix for all principal investigators

*Ensure that the printed copy of this document is the current version available on the Intranet.*

Property of the sanofi-aventis group - strictly confidential

# SUPPLEMENTARY DATA

| LIST OF PRINCIPAL INVESTIGATOR(S) AND SUB-INVESTIGATOR(S) PER STUDY SITE WHERE PATIENTS WERE ENROLLED |                                        |                                               |                        |                                                                                                                                                      |
|-------------------------------------------------------------------------------------------------------|----------------------------------------|-----------------------------------------------|------------------------|------------------------------------------------------------------------------------------------------------------------------------------------------|
| QSD-002219                                                                                            |                                        |                                               |                        |                                                                                                                                                      |
| Product Code:                                                                                         | AVE0010                                | Study Code:                                   | EFC12703               |                                                                                                                                                      |
| Study Center No.                                                                                      | Investigator last name and first name* | Role in the Investigation                     | Professional Degree(s) | Institutional Affiliation(s)                                                                                                                         |
| 710003                                                                                                | Burgess Lesley G.                      | Sub-Investigator/Co-Investigator RDC Approver | Professor              | TREAD Research - Cardiology Unit<br>Room 41, 8th Floor<br>Tygerburg Hospital<br>Francie van Zijl Drive<br>Parow<br>Cape Town<br>7500<br>SOUTH AFRICA |
| 710003                                                                                                | Coetzee Kathleen                       | Sub-Investigator/Co-Investigator RDC Approver | MD                     | TREAD Research - Cardiology Unit<br>Room 41, 8th Floor<br>Tygerburg Hospital<br>Francie van Zijl Drive<br>Parow<br>Cape Town<br>7500<br>SOUTH AFRICA |
| 710003                                                                                                | Maritz Lize-Jeanne                     | Principal Investigator                        | MD                     | TREAD Research - Cardiology Unit<br>Room 41, 8th Floor<br>Tygerburg Hospital<br>Francie van Zijl Drive<br>Parow<br>Cape Town<br>7500<br>SOUTH AFRICA |

\*CV provided as attachment to this appendix for all principal investigators

*Ensure that the printed copy of this document is the current version available on the Intranet.*

Property of the sanofi-aventis group - strictly confidential



# SUPPLEMENTARY DATA

| LIST OF PRINCIPAL INVESTIGATOR(S) AND SUB-INVESTIGATOR(S) PER STUDY SITE WHERE PATIENTS WERE ENROLLED |                                        |                                               |                        |                                                                                                                                                      |
|-------------------------------------------------------------------------------------------------------|----------------------------------------|-----------------------------------------------|------------------------|------------------------------------------------------------------------------------------------------------------------------------------------------|
| QSD-002219                                                                                            |                                        |                                               |                        |                                                                                                                                                      |
| Product Code:                                                                                         | AVE0010                                | Study Code:                                   | EFC12703               |                                                                                                                                                      |
| Study Center No.                                                                                      | Investigator last name and first name* | Role in the Investigation                     | Professional Degree(s) | Institutional Affiliation(s)                                                                                                                         |
| 710003                                                                                                | Prozesky Hans W.                       | Sub-Investigator/Co-Investigator RDC Approver | MD                     | TREAD Research - Cardiology Unit<br>Room 41, 8th Floor<br>Tygerburg Hospital<br>Francie van Zijl Drive<br>Parow<br>Cape Town<br>7500<br>SOUTH AFRICA |
| 710004                                                                                                | Conradie Hillet                        | Sub-Investigator/Co-Investigator RDC Approver | MD                     | Helderberg Clinical Trials Centre<br>7G&H Arun Place<br>Sir Lowry'S Pass Road<br>Western Cape<br>Somerset West<br>7130<br>SOUTH AFRICA               |
| 710004                                                                                                | Graham Ellis C.                        | Principal Investigator                        | MD                     | Helderberg Clinical Trials Centre<br>7G&H Arun Place<br>Sir Lowry'S Pass Road<br>Western Cape<br>Somerset West<br>7130<br>SOUTH AFRICA               |

\*CV provided as attachment to this appendix for all principal investigators

*Ensure that the printed copy of this document is the current version available on the Intranet.*

Property of the sanofi-aventis group - strictly confidential

# SUPPLEMENTARY DATA

| LIST OF PRINCIPAL INVESTIGATOR(S) AND SUB-INVESTIGATOR(S) PER STUDY SITE WHERE PATIENTS WERE ENROLLED |                                        |                                               |                        |                                                                                                                                        |
|-------------------------------------------------------------------------------------------------------|----------------------------------------|-----------------------------------------------|------------------------|----------------------------------------------------------------------------------------------------------------------------------------|
| QSD-002219                                                                                            |                                        |                                               |                        |                                                                                                                                        |
| Product Code:                                                                                         | AVE0010                                | Study Code:                                   | EFC12703               |                                                                                                                                        |
| Study Center No.                                                                                      | Investigator last name and first name* | Role in the Investigation                     | Professional Degree(s) | Institutional Affiliation(s)                                                                                                           |
| 710004                                                                                                | Pretorius Casper E.                    | Sub-Investigator/Co-Investigator RDC Approver | MD                     | Helderberg Clinical Trials Centre<br>7G&H Arun Place<br>Sir Lowry'S Pass Road<br>Western Cape<br>Somerset West<br>7130<br>SOUTH AFRICA |
| 710004                                                                                                | Urbach Dorothea V.                     | Sub-Investigator/Co-Investigator RDC Approver | MD                     | Helderberg Clinical Trials Centre<br>7G&H Arun Place<br>Sir Lowry'S Pass Road<br>Western Cape<br>Somerset West<br>7130<br>SOUTH AFRICA |
| 710004                                                                                                | Van Der Merwe Maryke                   | Sub-Investigator/Co-Investigator RDC Approver | MD                     | Helderberg Clinical Trials Centre<br>7G&H Arun Place<br>Sir Lowry'S Pass Road<br>Western Cape<br>Somerset West<br>7130<br>SOUTH AFRICA |
| 724001                                                                                                | Fajardo Montanana Carmen               | Sub-Investigator/Co-Investigator RDC Approver | MD                     | Hospital De La Ribera<br>Carretera De Corbera, Km. 1<br>Alcira<br>46600<br>Valencia<br>SPAIN                                           |

\*CV provided as attachment to this appendix for all principal investigators

*Ensure that the printed copy of this document is the current version available on the Intranet.*

Property of the sanofi-aventis group - strictly confidential

# SUPPLEMENTARY DATA

| LIST OF PRINCIPAL INVESTIGATOR(S) AND SUB-INVESTIGATOR(S) PER STUDY SITE WHERE PATIENTS WERE ENROLLED |                                        |                                               |                        |                                                                                                          |
|-------------------------------------------------------------------------------------------------------|----------------------------------------|-----------------------------------------------|------------------------|----------------------------------------------------------------------------------------------------------|
| QSD-002219                                                                                            |                                        |                                               |                        |                                                                                                          |
| Product Code:                                                                                         | AVE0010                                | Study Code:                                   | EFC12703               |                                                                                                          |
| Study Center No.                                                                                      | Investigator last name and first name* | Role in the Investigation                     | Professional Degree(s) | Institutional Affiliation(s)                                                                             |
| 724001                                                                                                | Garcia Zarco Mar                       | Sub-Investigator/Co-Investigator              | MD                     | Hospital De La Ribera<br>Carretera De Corbera, Km. 1<br>Alcira<br>46600<br>Valencia<br>SPAIN             |
| 724001                                                                                                | Trescoli Carlos S.                     | Principal Investigator                        | MD                     | Hospital De La Ribera<br>Carretera De Corbera, Km. 1<br>Alcira<br>46600<br>Valencia<br>SPAIN             |
| 724002                                                                                                | Beltran Robles M.                      | Principal Investigator                        | MD                     | Hospital Virgen del Camino<br>Ctra. Chipiona km 67,4<br>Sanlúcar De Barrameda<br>11540<br>Cádiz<br>SPAIN |
| 724002                                                                                                | Elvira-Gonzalez Javier                 | Sub-Investigator/Co-Investigator RDC Approver | MD                     | Hospital Virgen del Camino<br>Ctra. Chipiona km 67,4<br>Sanlúcar De Barrameda<br>11540<br>Cádiz<br>SPAIN |

\*CV provided as attachment to this appendix for all principal investigators

*Ensure that the printed copy of this document is the current version available on the Intranet.*

Property of the sanofi-aventis group - strictly confidential

# SUPPLEMENTARY DATA

| LIST OF PRINCIPAL INVESTIGATOR(S) AND SUB-INVESTIGATOR(S) PER STUDY SITE WHERE PATIENTS WERE ENROLLED |                                        |                                               |                        |                                                                                                                      |
|-------------------------------------------------------------------------------------------------------|----------------------------------------|-----------------------------------------------|------------------------|----------------------------------------------------------------------------------------------------------------------|
| QSD-002219                                                                                            |                                        |                                               |                        |                                                                                                                      |
| Product Code:                                                                                         | AVE0010                                | Study Code:                                   | EFC12703               |                                                                                                                      |
| Study Center No.                                                                                      | Investigator last name and first name* | Role in the Investigation                     | Professional Degree(s) | Institutional Affiliation(s)                                                                                         |
| 724002                                                                                                | Bascunas Antonio                       | Sub-Investigator/Co-Investigator RDC Approver | MD                     | Hospital Virgen del Camino<br>Ctra. Chipiona km 67,4<br>Sanlúcar De Barrameda<br>11540<br>Cádiz<br>SPAIN             |
| 724002                                                                                                | Lopez Suárez Alejandro                 | Sub-Investigator/Co-Investigator RDC Approver | MD                     | Hospital Virgen del Camino<br>Ctra. Chipiona km 67,4<br>Sanlúcar De Barrameda<br>11540<br>Cádiz<br>SPAIN             |
| 724003                                                                                                | Beltran Luis M.                        | Sub-Investigator/Co-Investigator RDC Approver | MD                     | Hospital La Paz<br>Servicio de Medicina Interna<br>Paseo De La Castellana, 261<br>Madrid<br>28046<br>Madrid<br>SPAIN |
| 724003                                                                                                | Garcia Puig Juan                       | Principal Investigator                        | MD                     | Hospital La Paz<br>Servicio de Medicina Interna<br>Paseo De La Castellana, 261<br>Madrid<br>28046<br>Madrid<br>SPAIN |

\*CV provided as attachment to this appendix for all principal investigators

Ensure that the printed copy of this document is the current version available on the Intranet.

Property of the sanofi-aventis group - strictly confidential

# SUPPLEMENTARY DATA

| LIST OF PRINCIPAL INVESTIGATOR(S) AND SUB-INVESTIGATOR(S) PER STUDY SITE WHERE PATIENTS WERE ENROLLED |                                        |                                               |                        |                                                                                                                                                                         |
|-------------------------------------------------------------------------------------------------------|----------------------------------------|-----------------------------------------------|------------------------|-------------------------------------------------------------------------------------------------------------------------------------------------------------------------|
| QSD-002219                                                                                            |                                        |                                               |                        |                                                                                                                                                                         |
| Product Code:                                                                                         | AVE0010                                | Study Code:                                   | EFC12703               |                                                                                                                                                                         |
| Study Center No.                                                                                      | Investigator last name and first name* | Role in the Investigation                     | Professional Degree(s) | Institutional Affiliation(s)                                                                                                                                            |
| 724004                                                                                                | Calvo Gomez Carlos                     | Principal Investigator                        | MD, PhD                | Complejo Hospitalario Universitario de Santiago<br>Servicio de Medicina Interna<br>Travesia De Chopuana, S / N<br>Santiago De Compostela<br>15706<br>La Coruña<br>SPAIN |
| 724004                                                                                                | Hermida Ameijeiras Alvaro              | Sub-Investigator/Co-Investigator RDC Approver | MD                     | Complejo Hospitalario Universitario de Santiago<br>Servicio de Medicina Interna<br>Travesia De Chopuana, S / N<br>Santiago De Compostela<br>15706<br>La Coruña<br>SPAIN |
| 724004                                                                                                | Lopez Jose Enrique                     | Sub-Investigator/Co-Investigator RDC Approver | MD                     | Complejo Hospitalario Universitario de Santiago<br>Servicio de Medicina Interna<br>Travesia De Chopuana, S / N<br>Santiago De Compostela<br>15706<br>La Coruña<br>SPAIN |
| 724004                                                                                                | Lopez Paz Jose E.                      | Sub-Investigator/Co-Investigator RDC Approver | MD                     | Complejo Hospitalario Universitario de Santiago<br>Travesia de Chopuana, s/n<br>Santiago De Compostela<br>15706<br>La Coruña<br>SPAIN                                   |

\*CV provided as attachment to this appendix for all principal investigators

*Ensure that the printed copy of this document is the current version available on the Intranet.*

Property of the sanofi-aventis group - strictly confidential

# SUPPLEMENTARY DATA

| LIST OF PRINCIPAL INVESTIGATOR(S) AND SUB-INVESTIGATOR(S) PER STUDY SITE WHERE PATIENTS WERE ENROLLED |                                        |                                               |                        |                                                                                                                                     |
|-------------------------------------------------------------------------------------------------------|----------------------------------------|-----------------------------------------------|------------------------|-------------------------------------------------------------------------------------------------------------------------------------|
| QSD-002219                                                                                            |                                        |                                               |                        |                                                                                                                                     |
| Product Code:                                                                                         | AVE0010                                | Study Code:                                   | EFC12703               |                                                                                                                                     |
| Study Center No.                                                                                      | Investigator last name and first name* | Role in the Investigation                     | Professional Degree(s) | Institutional Affiliation(s)                                                                                                        |
| 724005                                                                                                | Ciudin Andreea                         | Sub-Investigator/Co-Investigator RDC Approver | MD                     | Hospital Vall d'Hebrón<br>Servicio de Endocrinología<br>Paseo Del Valle Hebrón, 119-129<br>Barcelona<br>08035<br>Barcelona<br>SPAIN |
| 724005                                                                                                | Mesa Jordi                             | Sub-Investigator/Co-Investigator RDC Approver | MD                     | Hospital Vall d'Hebrón<br>Servicio de Endocrinología<br>Paseo Del Valle Hebrón, 119-129<br>Barcelona<br>08035<br>Barcelona<br>SPAIN |
| 724005                                                                                                | Mestres Soler Olga                     | Sub-Investigator/Co-Investigator RDC Approver | MD                     | Hospital Vall d'Hebrón<br>Servicio de Endocrinología<br>Paseo Del Valle Hebrón, 119-129<br>Barcelona<br>08035<br>Barcelona<br>SPAIN |

\*CV provided as attachment to this appendix for all principal investigators

*Ensure that the printed copy of this document is the current version available on the Intranet.*

Property of the sanofi-aventis group - strictly confidential

# SUPPLEMENTARY DATA

|                                                                                                       |  |  |  |
|-------------------------------------------------------------------------------------------------------|--|--|--|
| LIST OF PRINCIPAL INVESTIGATOR(S) AND SUB-INVESTIGATOR(S) PER STUDY SITE WHERE PATIENTS WERE ENROLLED |  |  |  |
| QSD-002219                                                                                            |  |  |  |

|               |         |             |          |
|---------------|---------|-------------|----------|
| Product Code: | AVE0010 | Study Code: | EFC12703 |
|---------------|---------|-------------|----------|

| Study Center No. | Investigator last name and first name* | Role in the Investigation                     | Professional Degree(s) | Institutional Affiliation(s)                                                                                                        |
|------------------|----------------------------------------|-----------------------------------------------|------------------------|-------------------------------------------------------------------------------------------------------------------------------------|
| 724005           | <a href="#">Simo Rafael</a>            | Principal Investigator                        | MD                     | Hospital Vall d'Hebrón<br>Servicio de Endocrinología<br>Paseo Del Valle Hebrón, 119-129<br>Barcelona<br>08035<br>Barcelona<br>SPAIN |
| 724005           | Simó Serrat Olga                       | Sub-Investigator/Co-Investigator RDC Approver | MD                     | Hospital Vall d'Hebrón<br>Servicio de Endocrinología<br>Paseo Del Valle Hebrón, 119-129<br>Barcelona<br>08035<br>Barcelona<br>SPAIN |
| 724006           | <a href="#">Ballarin Angels</a>        | Principal Investigator                        | MD                     | CAP Hostalets de Balenyà<br>C/ Major, 46<br>Hostalets De Balenyà<br>08550<br>Barcelona<br>SPAIN                                     |
| 752001           | <a href="#">Alvarsson Michael</a>      | Principal Investigator                        | MD                     | Endokrinologkliniken<br>Karolinska Universitetssjukhuset Solna<br>Stockholm<br>171 76<br>SWEDEN                                     |

\*CV provided as attachment to this appendix for all principal investigators

*Ensure that the printed copy of this document is the current version available on the Intranet.*

Property of the sanofi-aventis group - strictly confidential

# SUPPLEMENTARY DATA

|                                                                                                       |  |  |  |  |
|-------------------------------------------------------------------------------------------------------|--|--|--|--|
| LIST OF PRINCIPAL INVESTIGATOR(S) AND SUB-INVESTIGATOR(S) PER STUDY SITE WHERE PATIENTS WERE ENROLLED |  |  |  |  |
| QSD-002219                                                                                            |  |  |  |  |

|               |         |             |          |
|---------------|---------|-------------|----------|
| Product Code: | AVE0010 | Study Code: | EFC12703 |
|---------------|---------|-------------|----------|

| Study Center No. | Investigator last name and first name* | Role in the Investigation                     | Professional Degree(s) | Institutional Affiliation(s)                                                                    |
|------------------|----------------------------------------|-----------------------------------------------|------------------------|-------------------------------------------------------------------------------------------------|
| 752001           | Falhammar Henrik                       | Sub-Investigator/Co-Investigator RDC Approver | MD, PhD                | Endokrinologkliniken<br>Karolinska Universitetssjukhuset Solna<br>Stockholm<br>171 76<br>SWEDEN |
| 752002           | Lindholm Carl-Johan                    | Principal Investigator                        | MD                     | Capio citykliniken<br>Clementstorget 5<br>Lund<br>22221<br>SWEDEN                               |
| 752002           | Thulin Jörgen                          | Sub-Investigator/Co-Investigator RDC Approver | MD                     | Capio citykliniken<br>Clementstorget 5<br>Lund<br>22221<br>SWEDEN                               |
| 752003           | Tengmark Bengt-Olov                    | Principal Investigator                        | MD                     | Citydiabetes<br>Sveavägen 17 3tr<br>Stockholm<br>111 57<br>SWEDEN                               |
| 752004           | Ulla Britt Ericsson                    | Sub-Investigator/Co-Investigator              | PhD                    | Pharmasite<br>Föreningsgatan 26 3tr<br>Malmö<br>211 52<br>SWEDEN                                |

\*CV provided as attachment to this appendix for all principal investigators

*Ensure that the printed copy of this document is the current version available on the Intranet.*

Property of the sanofi-aventis group - strictly confidential



# SUPPLEMENTARY DATA

| LIST OF PRINCIPAL INVESTIGATOR(S) AND SUB-INVESTIGATOR(S) PER STUDY SITE WHERE PATIENTS WERE ENROLLED |                                        |                           |                        |                                                                                                         |
|-------------------------------------------------------------------------------------------------------|----------------------------------------|---------------------------|------------------------|---------------------------------------------------------------------------------------------------------|
| QSD-002219                                                                                            |                                        |                           |                        |                                                                                                         |
| Product Code:                                                                                         | AVE0010                                | Study Code:               | EFC12703               |                                                                                                         |
| Study Center No.                                                                                      | Investigator last name and first name* | Role in the Investigation | Professional Degree(s) | Institutional Affiliation(s)                                                                            |
| 752004                                                                                                | Koskinen Pekka                         | Principal Investigator    | MD                     | Pharmasite<br>Föreningsgatan 26 3tr<br>Malmö<br>211 52<br>SWEDEN                                        |
| 752006                                                                                                | Strömblad Gunnar                       | Principal Investigator    | MD                     | Carlanderska Sjukhuset<br>Carlanderplatsen<br>Göteborg<br>405 45<br>SWEDEN                              |
| 752007                                                                                                | Kempe Anders                           | Principal Investigator    | MD                     | Obeckakliniken<br>Härnösands Sjukhus<br>Sodra vagen 3-4<br>Härnösand<br>871 82<br>SWEDEN                |
| 826001                                                                                                | Mccoll Iain C.                         | Principal Investigator    | MD                     | Thornliebank Health Center<br>20 Kennishead Road<br>Glasgow<br>G46 8NY<br>Strathclyde<br>UNITED KINGDOM |

\*CV provided as attachment to this appendix for all principal investigators

*Ensure that the printed copy of this document is the current version available on the Intranet.*

Property of the sanofi-aventis group - strictly confidential

# SUPPLEMENTARY DATA

| LIST OF PRINCIPAL INVESTIGATOR(S) AND SUB-INVESTIGATOR(S) PER STUDY SITE WHERE PATIENTS WERE ENROLLED |                                        |                                               |                        |                                                                                                                             |
|-------------------------------------------------------------------------------------------------------|----------------------------------------|-----------------------------------------------|------------------------|-----------------------------------------------------------------------------------------------------------------------------|
| QSD-002219                                                                                            |                                        |                                               |                        |                                                                                                                             |
| Product Code:                                                                                         | AVE0010                                | Study Code:                                   | EFC12703               |                                                                                                                             |
| Study Center No.                                                                                      | Investigator last name and first name* | Role in the Investigation                     | Professional Degree(s) | Institutional Affiliation(s)                                                                                                |
| 826002                                                                                                | Gilhespie Andrew                       | Sub-Investigator/Co-Investigator RDC Approver | MD                     | Townhead Surgery<br>6-8 High Street<br>Irvine<br>KA12 0AY<br>Strathclyde<br>UNITED KINGDOM                                  |
| 826002                                                                                                | Russell Susan                          | Sub-Investigator/Co-Investigator RDC Approver | MD                     | Townhead Surgery<br>6-8 High Street<br>Irvine<br>KA12 0AY<br>Strathclyde<br>UNITED KINGDOM                                  |
| 826002                                                                                                | <a href="#">Simpson Hamish D.</a>      | Principal Investigator                        | MD                     | Townhead Surgery<br>6-8 High Street<br>Irvine<br>KA12 0AY<br>Strathclyde<br>UNITED KINGDOM                                  |
| 826003                                                                                                | <a href="#">Maxwell Thomas G.</a>      | Principal Investigator                        | MD                     | Little Common Surgery<br>82 Cooden Sea Road<br>Little Common<br>Bexhill-On-Sea<br>TN39 4SP<br>East Sussex<br>UNITED KINGDOM |

\*CV provided as attachment to this appendix for all principal investigators

*Ensure that the printed copy of this document is the current version available on the Intranet.*

Property of the sanofi-aventis group - strictly confidential

# SUPPLEMENTARY DATA

| LIST OF PRINCIPAL INVESTIGATOR(S) AND SUB-INVESTIGATOR(S) PER STUDY SITE WHERE PATIENTS WERE ENROLLED |                                        |                                  |                        |                                                                                                                         |
|-------------------------------------------------------------------------------------------------------|----------------------------------------|----------------------------------|------------------------|-------------------------------------------------------------------------------------------------------------------------|
| QSD-002219                                                                                            |                                        |                                  |                        |                                                                                                                         |
| Product Code:                                                                                         | AVE0010                                | Study Code:                      | EFC12703               |                                                                                                                         |
| Study Center No.                                                                                      | Investigator last name and first name* | Role in the Investigation        | Professional Degree(s) | Institutional Affiliation(s)                                                                                            |
| 826004                                                                                                | Bundy Charles R.                       | Principal Investigator           | MD                     | Adcroft Surgery<br>Prospect Place<br>Trowbridge<br>BA14 8QA<br>Wiltshire<br>UNITED KINGDOM                              |
| 826004                                                                                                | Locke Stephen M.                       | Sub-Investigator/Co-Investigator | MD                     | Adcroft Surgery<br>Prospect Place<br>Trowbridge<br>BA14 8QA<br>Wiltshire<br>UNITED KINGDOM                              |
| 840002                                                                                                | Bhargava Anuj                          | Principal Investigator           | MD                     | Iowa Diabetes & Endocrinology Center<br>411 Laurel Street<br>Suite 3262<br>Des Moines<br>50314<br>Iowa<br>UNITED STATES |
| 840002                                                                                                | Khoo Teck                              | Sub-Investigator/Co-Investigator | MD                     | Iowa Diabetes & Endocrinology Center<br>411 Laurel Street<br>Suite 3262<br>Des Moines<br>50314<br>Iowa<br>UNITED STATES |

\*CV provided as attachment to this appendix for all principal investigators

*Ensure that the printed copy of this document is the current version available on the Intranet.*

Property of the sanofi-aventis group - strictly confidential

# SUPPLEMENTARY DATA

| LIST OF PRINCIPAL INVESTIGATOR(S) AND SUB-INVESTIGATOR(S) PER STUDY SITE WHERE PATIENTS WERE ENROLLED |                                        |                                  |                        |                                                                                                                         |
|-------------------------------------------------------------------------------------------------------|----------------------------------------|----------------------------------|------------------------|-------------------------------------------------------------------------------------------------------------------------|
| QSD-002219                                                                                            |                                        |                                  |                        |                                                                                                                         |
| Product Code:                                                                                         | AVE0010                                | Study Code:                      | EFC12703               |                                                                                                                         |
| Study Center No.                                                                                      | Investigator last name and first name* | Role in the Investigation        | Professional Degree(s) | Institutional Affiliation(s)                                                                                            |
| 840002                                                                                                | Langel Christine                       | Nurse                            | Nurse Practionner      | Iowa Diabetes & Endocrinology Center<br>411 Laurel Street<br>Suite 3262<br>Des Moines<br>50314<br>Iowa<br>UNITED STATES |
| 840002                                                                                                | Netten-Foster Lisa                     | Sub-Investigator/Co-Investigator | Physician Assistant    | Iowa Diabetes & Endocrinology Center<br>411 Laurel Street<br>Suite 3262<br>Des Moines<br>50314<br>Iowa<br>UNITED STATES |
| 840002                                                                                                | Theuma Pierre                          | Sub-Investigator/Co-Investigator | MD                     | Iowa Diabetes & Endocrinology Center<br>411 Laurel Street<br>Suite 3262<br>Des Moines<br>50314<br>Iowa<br>UNITED STATES |

\*CV provided as attachment to this appendix for all principal investigators

*Ensure that the printed copy of this document is the current version available on the Intranet.*

Property of the sanofi-aventis group - strictly confidential

# SUPPLEMENTARY DATA

| LIST OF PRINCIPAL INVESTIGATOR(S) AND SUB-INVESTIGATOR(S) PER STUDY SITE WHERE PATIENTS WERE ENROLLED |                                        |                                  |                        |                                                                                                                              |
|-------------------------------------------------------------------------------------------------------|----------------------------------------|----------------------------------|------------------------|------------------------------------------------------------------------------------------------------------------------------|
| QSD-002219                                                                                            |                                        |                                  |                        |                                                                                                                              |
| Product Code:                                                                                         | AVE0010                                | Study Code:                      | EFC12703               |                                                                                                                              |
| Study Center No.                                                                                      | Investigator last name and first name* | Role in the Investigation        | Professional Degree(s) | Institutional Affiliation(s)                                                                                                 |
| 840003                                                                                                | Breton Cristian F.                     | Principal Investigator           | MD                     | International Research Associates LLC<br>8200 SW 117th Ave.<br>Suite 210<br>Miami<br>33183<br>Florida<br>UNITED STATES       |
| 840004                                                                                                | Rodbard Helena                         | Principal Investigator           | MD                     | Endocrine and Metabolic Consultants<br>3200 Tower Oaks Blvd.<br>Suite 250<br>Rockville<br>20852<br>Maryland<br>UNITED STATES |
| 840004                                                                                                | DEMPSEY Michael A.                     | Sub-Investigator/Co-Investigator | MD                     | Endocrine and Metabolic Consultants<br>3200 Tower Oaks Blvd.<br>Suite 250<br>Rockville<br>20852<br>Maryland<br>UNITED STATES |

\*CV provided as attachment to this appendix for all principal investigators

*Ensure that the printed copy of this document is the current version available on the Intranet.*

Property of the sanofi-aventis group - strictly confidential

# SUPPLEMENTARY DATA

| LIST OF PRINCIPAL INVESTIGATOR(S) AND SUB-INVESTIGATOR(S) PER STUDY SITE WHERE PATIENTS WERE ENROLLED |                                        |                                  |                        |                                                                                                          |
|-------------------------------------------------------------------------------------------------------|----------------------------------------|----------------------------------|------------------------|----------------------------------------------------------------------------------------------------------|
| QSD-002219                                                                                            |                                        |                                  |                        |                                                                                                          |
| Product Code:                                                                                         | AVE0010                                | Study Code:                      | EFC12703               |                                                                                                          |
| Study Center No.                                                                                      | Investigator last name and first name* | Role in the Investigation        | Professional Degree(s) | Institutional Affiliation(s)                                                                             |
| 840006                                                                                                | Lillestol Michael J.                   | Principal Investigator           | MD                     | Lillestol Research, LLC<br>1711 Gold Dr.<br>Suite 170<br>Fargo<br>58103<br>North Dakota<br>UNITED STATES |
| 840006                                                                                                | BROWN Jamie                            | Sub-Investigator/Co-Investigator | PA-C                   | Lillestol Research, LLC<br>1711 Gold Dr.<br>Suite 170<br>Fargo<br>58103<br>North Dakota<br>UNITED STATES |
| 840006                                                                                                | Yohe mark                              | Sub-Investigator/Co-Investigator | MD                     | Lillestol Research, LLC<br>1711 Gold Dr.<br>Suite 170<br>Fargo<br>58103<br>North Dakota<br>UNITED STATES |

\*CV provided as attachment to this appendix for all principal investigators

*Ensure that the printed copy of this document is the current version available on the Intranet.*

Property of the sanofi-aventis group - strictly confidential

# SUPPLEMENTARY DATA

| LIST OF PRINCIPAL INVESTIGATOR(S) AND SUB-INVESTIGATOR(S) PER STUDY SITE WHERE PATIENTS WERE ENROLLED |                                        |                                  |                        |                                                                                                                               |
|-------------------------------------------------------------------------------------------------------|----------------------------------------|----------------------------------|------------------------|-------------------------------------------------------------------------------------------------------------------------------|
| QSD-002219                                                                                            |                                        |                                  |                        |                                                                                                                               |
| Product Code:                                                                                         | AVE0010                                | Study Code:                      | EFC12703               |                                                                                                                               |
| Study Center No.                                                                                      | Investigator last name and first name* | Role in the Investigation        | Professional Degree(s) | Institutional Affiliation(s)                                                                                                  |
| 840007                                                                                                | Jain Rajeev K.                         | Principal Investigator           | MD                     | Advanced HealthCare<br>Clinical Research Center<br>3003 W. Good Hope Road<br>Milwaukee<br>53209<br>Wisconsin<br>UNITED STATES |
| 840008                                                                                                | Ong Stephen                            | Principal Investigator           | MD                     | MD Medical Research<br>6357 Oxon Hill Road<br>Oxon Hill<br>20745<br>Maryland<br>UNITED STATES                                 |
| 840008                                                                                                | Reyes Josephine                        | Sub-Investigator/Co-Investigator | MD                     | MD Medical Research<br>6357 Oxon Hill Road<br>Oxon Hill<br>20745<br>Maryland<br>UNITED STATES                                 |
| 840009                                                                                                | Rendell Marc                           | Principal Investigator           | MD                     | Creighton University Medical Center<br>601 N 30th St.<br>Suite 6715<br>Omaha<br>68131<br>Nebraska<br>UNITED STATES            |

\*CV provided as attachment to this appendix for all principal investigators

*Ensure that the printed copy of this document is the current version available on the Intranet.*

Property of the sanofi-aventis group - strictly confidential

# SUPPLEMENTARY DATA

| LIST OF PRINCIPAL INVESTIGATOR(S) AND SUB-INVESTIGATOR(S) PER STUDY SITE WHERE PATIENTS WERE ENROLLED |                                        |                                  |                        |                                                                                                                      |
|-------------------------------------------------------------------------------------------------------|----------------------------------------|----------------------------------|------------------------|----------------------------------------------------------------------------------------------------------------------|
| QSD-002219                                                                                            |                                        |                                  |                        |                                                                                                                      |
| Product Code:                                                                                         | AVE0010                                | Study Code:                      | EFC12703               |                                                                                                                      |
| Study Center No.                                                                                      | Investigator last name and first name* | Role in the Investigation        | Professional Degree(s) | Institutional Affiliation(s)                                                                                         |
| 840009                                                                                                | Kuechenmeister Lisa                    | Sub-Investigator/Co-Investigator | Physician Assistant    | Creighton University Medical Center<br>601 N 30th St.<br>Suite 6715<br>Omaha<br>68131<br>Nebraska<br>UNITED STATES   |
| 840010                                                                                                | Dailey George E.                       | Principal Investigator           | MD                     | Scripps Research Institute<br>9894 Genesee Avenue<br>La Jolla<br>92037<br>California<br>UNITED STATES                |
| 840010                                                                                                | Philis-Tsimikas Athena                 | Sub-Investigator/Co-Investigator | MD                     | Scripps Research Institute<br>9894 Genesee Avenue<br>La Jolla<br>92037<br>California<br>UNITED STATES                |
| 840011                                                                                                | Frame Joshua                           | Principal Investigator           | Doctor of Osteopathy   | Chrysalis Clinical Research<br>1490 E. Foremaster Drive<br>Suite 220<br>St. George<br>84790<br>Utah<br>UNITED STATES |

\*CV provided as attachment to this appendix for all principal investigators

*Ensure that the printed copy of this document is the current version available on the Intranet.*

Property of the sanofi-aventis group - strictly confidential



# SUPPLEMENTARY DATA

| LIST OF PRINCIPAL INVESTIGATOR(S) AND SUB-INVESTIGATOR(S) PER STUDY SITE WHERE PATIENTS WERE ENROLLED |                                        |                                  |                        |                                                                                                                      |
|-------------------------------------------------------------------------------------------------------|----------------------------------------|----------------------------------|------------------------|----------------------------------------------------------------------------------------------------------------------|
| QSD-002219                                                                                            |                                        |                                  |                        |                                                                                                                      |
| Product Code:                                                                                         | AVE0010                                | Study Code:                      | EFC12703               |                                                                                                                      |
| Study Center No.                                                                                      | Investigator last name and first name* | Role in the Investigation        | Professional Degree(s) | Institutional Affiliation(s)                                                                                         |
| 840011                                                                                                | Madsen Daniel                          | Sub-Investigator/Co-Investigator | MD                     | Chrysalis Clinical Research<br>1490 E. Foremaster Drive<br>Suite 220<br>St. George<br>84790<br>Utah<br>UNITED STATES |
| 840011                                                                                                | Powell John J.                         | Sub-Investigator/Co-Investigator | Physician Assistant    | Chrysalis Clinical Research<br>1490 E. Foremaster Drive<br>Suite 220<br>St. George<br>84790<br>Utah<br>UNITED STATES |
| 840011                                                                                                | Woolley Joseph H.                      | Sub-Investigator/Co-Investigator | MD                     | Chrysalis Clinical Research<br>1490 E. Foremaster Drive<br>Suite 220<br>St. George<br>84790<br>Utah<br>UNITED STATES |

\*CV provided as attachment to this appendix for all principal investigators

*Ensure that the printed copy of this document is the current version available on the Intranet.*

Property of the sanofi-aventis group - strictly confidential

# SUPPLEMENTARY DATA

| LIST OF PRINCIPAL INVESTIGATOR(S) AND SUB-INVESTIGATOR(S) PER STUDY SITE WHERE PATIENTS WERE ENROLLED |                                        |                                  |                        |                                                                                                                      |
|-------------------------------------------------------------------------------------------------------|----------------------------------------|----------------------------------|------------------------|----------------------------------------------------------------------------------------------------------------------|
| QSD-002219                                                                                            |                                        |                                  |                        |                                                                                                                      |
| Product Code:                                                                                         | AVE0010                                | Study Code:                      | EFC12703               |                                                                                                                      |
| Study Center No.                                                                                      | Investigator last name and first name* | Role in the Investigation        | Professional Degree(s) | Institutional Affiliation(s)                                                                                         |
| 840011                                                                                                | Busk Christian                         | Sub-Investigator/Co-Investigator | MD                     | Chrysalis Clinical Research<br>1490 E. Foremaster Drive<br>Suite 220<br>St. George<br>84790<br>Utah<br>UNITED STATES |
| 840011                                                                                                | Barton Scott                           | Sub-Investigator/Co-Investigator | MD                     | Chrysalis Clinical Research<br>1490 E. Foremaster Drive<br>Suite 220<br>St. George<br>84790<br>Utah<br>UNITED STATES |
| 840012                                                                                                | Garcia Lazaro M.                       | Principal Investigator           | MD                     | International Research Associates, LLC<br>3626 NW 7 Street<br>Miami<br>33125<br>Florida<br>UNITED STATES             |
| 840014                                                                                                | Ison Rodney K.                         | Principal Investigator           | MD                     | Community Health Care<br>944 E Cherry St.<br>Canal Fulton<br>44614<br>Ohio<br>UNITED STATES                          |

\*CV provided as attachment to this appendix for all principal investigators

*Ensure that the printed copy of this document is the current version available on the Intranet.*

Property of the sanofi-aventis group - strictly confidential

# SUPPLEMENTARY DATA

| LIST OF PRINCIPAL INVESTIGATOR(S) AND SUB-INVESTIGATOR(S) PER STUDY SITE WHERE PATIENTS WERE ENROLLED |                                        |                                  |                        |                                                                                                                        |
|-------------------------------------------------------------------------------------------------------|----------------------------------------|----------------------------------|------------------------|------------------------------------------------------------------------------------------------------------------------|
| QSD-002219                                                                                            |                                        |                                  |                        |                                                                                                                        |
| Product Code:                                                                                         | AVE0010                                | Study Code:                      | EFC12703               |                                                                                                                        |
| Study Center No.                                                                                      | Investigator last name and first name* | Role in the Investigation        | Professional Degree(s) | Institutional Affiliation(s)                                                                                           |
| 840015                                                                                                | Cruz Lucita M.                         | Principal Investigator           | MD                     | Lucita M. Cruz, M.D., Inc<br>12507 East Alondra Bld.<br>Norwalk<br>90650<br>California<br>UNITED STATES                |
| 840016                                                                                                | McNeill Robert E.                      | Principal Investigator           | MD                     | PMG Research of Salisbury<br>410 Mocksville Ave.<br>Suite 200<br>Salisbury<br>28144<br>North Carolina<br>UNITED STATES |
| 840016                                                                                                | Farrington Cecil M.                    | Sub-Investigator/Co-Investigator | MD                     | PMG Research of Salisbury<br>410 Mocksville Ave.<br>Suite 200<br>Salisbury<br>28144<br>North Carolina<br>UNITED STATES |
| 840016                                                                                                | Pittman Amy                            | Sub-Investigator/Co-Investigator | CRC                    | PMG Research of Salisbury<br>410 Mocksville Ave.<br>Suite 200<br>Salisbury<br>28144<br>North Carolina<br>UNITED STATES |

\*CV provided as attachment to this appendix for all principal investigators

Ensure that the printed copy of this document is the current version available on the Intranet.

Property of the sanofi-aventis group - strictly confidential

# SUPPLEMENTARY DATA

| LIST OF PRINCIPAL INVESTIGATOR(S) AND SUB-INVESTIGATOR(S) PER STUDY SITE WHERE PATIENTS WERE ENROLLED |                                        |                                  |                        |                                                                                                                                    |
|-------------------------------------------------------------------------------------------------------|----------------------------------------|----------------------------------|------------------------|------------------------------------------------------------------------------------------------------------------------------------|
| QSD-002219                                                                                            |                                        |                                  |                        |                                                                                                                                    |
| Product Code:                                                                                         | AVE0010                                | Study Code:                      | EFC12703               |                                                                                                                                    |
| Study Center No.                                                                                      | Investigator last name and first name* | Role in the Investigation        | Professional Degree(s) | Institutional Affiliation(s)                                                                                                       |
| 840016                                                                                                | Haywood Ashley                         | Sub-Investigator/Co-Investigator | CRC                    | PMG Research of Salisbury<br>410 Mocksville Ave.<br>Suite 200<br>Salisbury<br>28144<br>North Carolina<br>UNITED STATES             |
| 840016                                                                                                | Fox Alana                              | Sub-Investigator/Co-Investigator | CCRC                   | PMG Research of Salisbury<br>410 Mocksville Ave.<br>Suite 200<br>Salisbury<br>28144<br>North Carolina<br>UNITED STATES             |
| 840017                                                                                                | Mikhail Magdy                          | Principal Investigator           | MD                     | The Center for Clinical Trials<br>2781 C.T. Switzer Sr. Dr.<br>Suites 301 / 305<br>Biloxi<br>39531<br>Mississippi<br>UNITED STATES |

\*CV provided as attachment to this appendix for all principal investigators

*Ensure that the printed copy of this document is the current version available on the Intranet.*

Property of the sanofi-aventis group - strictly confidential

# SUPPLEMENTARY DATA

| LIST OF PRINCIPAL INVESTIGATOR(S) AND SUB-INVESTIGATOR(S) PER STUDY SITE WHERE PATIENTS WERE ENROLLED |                                        |                                  |                        |                                                                                                                                    |
|-------------------------------------------------------------------------------------------------------|----------------------------------------|----------------------------------|------------------------|------------------------------------------------------------------------------------------------------------------------------------|
| QSD-002219                                                                                            |                                        |                                  |                        |                                                                                                                                    |
| Product Code:                                                                                         | AVE0010                                | Study Code:                      | EFC12703               |                                                                                                                                    |
| Study Center No.                                                                                      | Investigator last name and first name* | Role in the Investigation        | Professional Degree(s) | Institutional Affiliation(s)                                                                                                       |
| 840017                                                                                                | Ladner Joann                           | Nurse                            | Registered Nurse       | The Center for Clinical Trials<br>2781 C.T. Switzer Sr. Dr.<br>Suites 301 / 305<br>Biloxi<br>39531<br>Mississippi<br>UNITED STATES |
| 840017                                                                                                | Kakish Lily                            | Sub-Investigator/Co-Investigator | MD                     | The Center for Clinical Trials<br>2781 C.T. Switzer Sr. Dr.<br>Suites 301 / 305<br>Biloxi<br>39531<br>Mississippi<br>UNITED STATES |

\*CV provided as attachment to this appendix for all principal investigators

*Ensure that the printed copy of this document is the current version available on the Intranet.*

Property of the sanofi-aventis group - strictly confidential
